# Supplementary material for: Design and Synthesis of Lactams Derived from Mucochloric and Mucobromic Acids as Pseudomonas aeruginosa Quorum Sensing Inhibitors
Source: PubMed Central journal article supplement (PMC6100351; doi:10.3390/molecules23051106), 2018-05-07

## Supplementary Materials

### Design and Synthesis of Lactams Derived from Mucochloric and Mucobromic Acids as *Pseudomonas aeruginosa* Quorum Sensing Inhibitors

Basmah Almohaywi<sup>1,2</sup>, Aditi Taunk<sup>1</sup>, Daniel S. Wenzholz<sup>1</sup>, Shashidhar Nizalapur<sup>1</sup>, Nripendra Nath Biswas<sup>1</sup>, Kitty K. K. Ho<sup>1</sup>, Scott A. Rice<sup>3</sup>, George Iskander<sup>1</sup>, David Black<sup>1</sup>, Renate Griffith<sup>4</sup> and Naresh Kumar<sup>\*1</sup>

## Table of Contents

|                                                                                                         |    |
|---------------------------------------------------------------------------------------------------------|----|
| <b>Table S1.</b> Growth inhibition (OD 600 reduction) at different concentrations. ....                 | 3  |
| <b>Table S2.</b> Docking of lactams to the LasR receptor protein of <i>P. aeruginosa</i> . ....         | 4  |
| <b>Spectra Data</b> <sup>1</sup> H NMR and <sup>13</sup> C NMR Spectra .....                            | 6  |
| 2) 3,4-dichloro-1-hexyl-1,5-dihydro-2H-pyrrol-2-one (Compound 10).....                                  | 7  |
| 3) 3,4-dichloro-1-(2-hydroxyphenyl)-1,5-dihydro-2H-pyrrol-2-one (Compound 12) .....                     | 8  |
| 4) 3,4-dichloro-1-(3-hydroxyphenyl)-1,5-dihydro-2H-pyrrol-2-one (Compound 13) .....                     | 9  |
| 5) 3,4-dichloro-1-(4-hydroxyphenyl)-1,5-dihydro-2H-pyrrol-2-one (Compound 14) .....                     | 10 |
| 6) N-(3-carboxyphenyl)-3,4-dibromo-1,5-dihydro-2H-pyrrol-2-one (DHP phenyl acid-2) (Compound 15) .....  | 11 |
| 7) N-(4-carboxyphenyl)-3,4-dichloro-1,5-dihydro-2H-pyrrol-2-one (DHP phenyl acid-1) (Compound 16) ..... | 12 |
| 8) N-(3-tert-butylphenylcarbamate)-3,4-dichloro-1,5-dihydro-2H-pyrrol-2-one (Compound 17).....          | 13 |
| 9) N-(4'-tert-butylphenylcarbamate)-3,4-dichloro-1,5-dihydro-2H-pyrrol-2-one (Compound 18).....         | 14 |
| 10) N-(3-aminophenyl)-3,4-dichloro-1,5-dihydro-2H-pyrrol-2-one (compound 19) .....                      | 15 |
| 11) N-(4-aminophenyl)-3,4-dichloro-1,5-dihydro-2H-pyrrol-2-one (Compound 20) .....                      | 16 |
| 12) 4-(3,4-dichloro-2-oxo-2,5-dihydro-1H-pyrrol-1-yl)butanoic acid (Compound 21).....                   | 17 |
| 13) 1-allyl-3,4-dichloro-1,5-dihydro-2H-pyrrol-2-one (Compound 22) .....                                | 18 |
| 14) 3,4-dichloro-1-phenyl-1,5-dihydro-2H-pyrrol-2-one (Compound 23) .....                               | 19 |
| 15) 3,4-dibromo-1-phenyl-1,5-dihydro-2H-pyrrol-2-one (Compound 24).....                                 | 20 |
| 16) 3,4-dibromo-1-(3-hydroxyphenyl)-1,5-dihydro-2H-pyrrol-2-one (Compound 25).....                      | 21 |
| 17) N-(3-carboxyphenyl)-3,4-dichloro-1,5-dihydro-2H-pyrrol-2-one (Compound 26).....                     | 22 |
| 18) N-(4-carboxyphenyl)-3,4-dichloro-1,5-dihydro-2H-pyrrol-2-one.....                                   | 23 |
| (Compound 27).....                                                                                      | 23 |
| 19) N-(4'-tert-butylphenylcarbamate)-3,4-dibromo-1,5-dihydro-2H-pyrrol-2-one (Compound 28) .....        | 24 |
| 20) N-(4-aminophenyl)-3,4-dibromo-1,5-dihydro-2H-pyrrol-2-one (DHP phenyl amine-2) (Compound 29) .....  | 25 |

|                                                                                                                                        |    |
|----------------------------------------------------------------------------------------------------------------------------------------|----|
| 22) 1-(2-(1 <i>H</i> -indol-3-yl)ethyl)-3,4-dichloro-1,5-dihydro-2 <i>H</i> -pyrrol-2-one<br>(Compound 31).....                        | 27 |
| 23) <i>N</i> -butyl-4-(3,4-dichloro-2-oxo-2,5-dihydro-1 <i>H</i> -pyrrol-1-yl)benzamide<br>(Compound 32).....                          | 28 |
| 24) <i>N</i> -hexyl-4-(3,4-dichloro-2-oxo-2,5-dihydro-1 <i>H</i> -pyrrol-1-yl)benzamide<br>(Compound 33).....                          | 29 |
| 25) <i>N</i> -benzyl-4-(3,4-dichloro-2-oxo-2,5-dihydro-1 <i>H</i> -pyrrol-1-yl)benzamide<br>(Compound 34).....                         | 30 |
| 26) <i>N</i> -(2-(1 <i>H</i> -indol-3-yl)ethyl)-4-(3,4-dichloro-2-oxo-2,5-dihydro-1 <i>H</i> -pyrrol-1-yl)benzamide (Compound 35)..... | 31 |
| 27) 4-(3,4-dichloro-2-oxo-2,5-dihydro-1 <i>H</i> -pyrrol-1-yl)- <i>N</i> -(2-morpholinoethyl)benzamide (Compound 36).....              | 32 |
| 28) 4-(3,4-dichloro-2-oxo-2,5-dihydro-1 <i>H</i> -pyrrol-1-yl)- <i>N</i> -(3-morpholinopropyl)benzamide (Compound 37).....             | 33 |
| 30) <i>N</i> -(4-(3,4-dichloro-2-oxo-2,5-dihydro-1 <i>H</i> -pyrrol-1-yl)phenyl)butyramide<br>(Compound 39).....                       | 35 |
| 31) <i>N</i> -(4-(3,4-dichloro-2-oxo-2,5-dihydro-1 <i>H</i> -pyrrol-1-yl)phenyl)hexanamide<br>(Compound 40).....                       | 36 |
| 32) <i>N</i> -(4-(3,4-dichloro-2-oxo-2,5-dihydro-1 <i>H</i> -pyrrol-1-yl)phenyl)octanamide<br>(Compound 41).....                       | 37 |
| 33) 2-(4-bromophenyl)- <i>N</i> -(4-(3,4-dichloro-2-oxo-2,5-dihydro-1 <i>H</i> -pyrrol-1-yl)phenyl)acetamide (Compound 42).....        | 38 |

**Table S1.** Growth inhibition (OD 600 reduction) at different concentrations.

| Compound | % reduction of bacterial growth |                  |                  |
|----------|---------------------------------|------------------|------------------|
|          | 250 $\mu$ M                     | 125 $\mu$ M      | 62.5 $\mu$ M     |
| 9        | 23.5 $\pm$ 1.0                  | 11.8 $\pm$ 1.8   | 0                |
| 10       | 22.5 $\pm$ 0.5                  | 9.1 $\pm$ 0.5    | 0                |
| 11       | 18.1 $\pm$ 3.4                  | 12.0 $\pm$ 2.5   | 0                |
| 12       | 27.0 $\pm$ 5.7                  | 9.2 $\pm$ 2.6    | 0                |
| 13       | 21.3 $\pm$ 3.6                  | 6.1 $\pm$ 0.8    | 0                |
| 14       | 13.6 $\pm$ 3.3                  | 11.6 $\pm$ 3.3   | 0                |
| 15       | 0                               | 0                | 0                |
| 16       | 0                               | 0                | 0                |
| 19       | 6.83 $\pm$ 0.6                  | 0                | 0                |
| 20       | 4.10 $\pm$ 3.7                  | 0                | 0                |
| 21       | 3.00 $\pm$ 3.26                 | 0                | 0                |
| 22       | 25.2 $\pm$ 1.8                  | 14.7 $\pm$ 0.89  | 0                |
| 23       | 21.2 $\pm$ 2.1                  | 15.9 $\pm$ 0.008 | 9.06 $\pm$ 0.001 |
| 24       | 15.9 $\pm$ 3.0                  | 12.5 $\pm$ 4.1   | 3.30 $\pm$ 0.005 |
| 25       | 14.7 $\pm$ 0.6                  | 0                | 0                |
| 26       | 0                               | 0                | 0                |
| 27       | 0                               | 0                | 0                |
| 29       | 0                               | 0                | 0                |
| 30       | 13.4 $\pm$ 1.7                  | 5.9 $\pm$ 1.0    | 0                |
| 31       | 12.3 $\pm$ 6.5                  | 4.7 $\pm$ 6.2    | 0                |
| 32       | 12.0 $\pm$ 4.5                  | 7.5 $\pm$ 5      | 0                |
| 33       | 7.5 $\pm$ 2.5                   | 5.2 $\pm$ 5.8    | 0                |
| 34       | 5.5 $\pm$ 3.9                   | 0                | 0                |
| 35       | 6.0 $\pm$ 4.4                   | 0                | 0                |
| 36       | 7.8 $\pm$ 0.5                   | 3.9 $\pm$ 2.1    | 0                |
| 37       | 7.7 $\pm$ 5.4                   | 7.0 $\pm$ 1.2    | 0                |
| 38       | 4.6 $\pm$ 3.4                   | 0                | 0                |
| 39       | 0                               | 0                | 0                |
| 40       | 0                               | 0                | 0                |
| 41       | 0                               | 0                | 0                |
| 42       | 0                               | 0                | 0                |
| TP-5     | 0                               |                  |                  |
| 5        | 86.5 $\pm$ 2.6                  | 53.2 $\pm$ 4.5   | 44.2 $\pm$ 1.6   |

**Table S2.** Docking of lactams to the LasR receptor protein of *P. aeruginosa*.

| Entry | GoldScore | <sup>a</sup> Pose No. | H-bond interactions  | electrostatic interactions                      | <sup>b</sup> Hydrophobic and $\pi$ interactions     |
|-------|-----------|-----------------------|----------------------|-------------------------------------------------|-----------------------------------------------------|
| 9     | 48.12     | 1                     | Arg61, Trp60         | Tyr64 <sup>d</sup>                              | Ala105, Ala127, Leu36, Phe101, Trp88, Val76         |
| 10    | 53.36     | 1                     | Arg61                | Tyr64 <sup>d</sup>                              | Ala105, Ala127, Leu36, Leu110, Trp88, Val76         |
| 11    | 53.33     | 1                     | Arg61                | TYR64 <sup>d</sup>                              | Ala70, Ala50, Ile52, Val76                          |
| 12    | 48.00     | 3                     | Trp60, Tyr56         | —                                               | Leu36, Phe101, Trp88, Tyr64                         |
| 13    | 53.6      | 1                     | Arg61, Trp60         | Leu110 <sup>c</sup>                             | Leu36, Trp88, Tyr56, Tyr93,                         |
| 14    | 52.26     | 1                     | Leu110, Trp60,       | —                                               | Ala105, Ala127, Leu36, Phe101, Trp88, Val76,        |
| 15    | 58.90     | 6                     | Arg61, TRP60, TYR93  | Leu110 <sup>c</sup> , Trp88, Tyr64 <sup>e</sup> | Ile92, Leu36, Tyr56                                 |
| 16    | 58.33     | 1                     | Arg61, Leu110        | Asp73 <sup>d</sup> , Trp88, Tyr64 <sup>e</sup>  | Leu36, Tyr56, Val76                                 |
| 19    | 54.25     | 1                     | Arg61                | Asp73 <sup>d</sup> , Tyr64 <sup>e</sup>         | Ala127, Leu36, Val76                                |
| 20    | 52.67     | 1                     | Arg61                | Asp73 <sup>d</sup> , Tyr64 <sup>e</sup>         | Ala127, Leu36, Val76                                |
| 21    | 50.47     | 15                    | Arg61                | Asp73 <sup>d</sup> , Tyr64 <sup>e</sup>         | Ala127, Leu36, Val76                                |
| 22    | 43.31     | 1                     | Trp60                | —                                               | Ala127, Trp88, Val76                                |
| 23    | 51.06     | 4                     | Trp60                | —                                               | Ala105, Ala127, Leu36, Leu110, Phe101, Trp88, Tyr64 |
| 24    | 52.39     | 1                     | Arg61                | Asp73 <sup>d</sup> , Tyr64 <sup>e</sup>         | Ala127, Leu36, Val76                                |
| 25    | 55.22     | 12                    | Trp60, Arg61, ,Tyr93 | Leu110 <sup>c</sup> , Tyr64 <sup>e</sup>        | Trp88, Tyr56, Leu36                                 |
| 26    | 57.87     | 7                     | Arg61, Trp60         | Trp88 <sup>e</sup>                              | Ala127, Leu36, Tyr93, Val76                         |
| 27    | 59.58     | 1                     | Arg61, Leu110, Tyr93 | Asp73 <sup>d</sup>                              | Ala127, Leu36, Tyr56                                |
| 29    | 52.32     | 1                     | Arg61, Trp60         | —                                               | Ala50, , Ala70, Ala105, Leu110, Trp88, Tyr47        |
| 30    | 62.25     | 1                     | Arg61, THR 115       | Asp65 <sup>c</sup> , Asp73 <sup>d</sup>         | Ala50, , Ala70, Ala105, Tyr47, Trp88, Leu110,       |
| 31    | 60.95     | 7                     | Arg61, Leu110        | Tyr64 <sup>e</sup>                              | Ala105, Ala127, Leu36, Trp88,                       |
| 32    | 65.87     | 1                     | Trp60                | —                                               | Leu36, Leu40, Leu125, Trp88, Tyr64, , Tyr47         |
| 33    | 73.79     | 1                     | Arg61                | Leu110 <sup>c</sup>                             | Leu36, Leu40, Leu125, Tyr64, Tyr93, Ile92, Tyr47    |
| 34    | 74.59     | 1                     | Trp60                | —                                               | Ala50, Ala127, Leu36, Leu40 Trp88, Tyr64,           |

|                |       |   |                             |                                                                |                                                                  |
|----------------|-------|---|-----------------------------|----------------------------------------------------------------|------------------------------------------------------------------|
| 35             | 79.83 | 1 | Arg61                       | Leu110 <sup>c</sup>                                            | Ala50, Ala70, Leu36, Leu40, Ile92, Tyr47, Tyr56, Tyr93, Val76    |
| 36             | 66.85 | 1 | Thr115, Arg61               | Leu110 <sup>c</sup> , Thr75 <sup>f</sup>                       | Ala50, Ala70, Ala105, Leu36, Tyr47, Tyr56, Tyr64, Val76          |
| 37             | 74.03 | 1 | Arg61, Trp60, Tyr93         | Leu110 <sup>c</sup>                                            | Ala50, Ala127, Leu40, Leu36, Tyr64, Val76                        |
| 38             | 64.20 | 1 | Arg61                       | Leu110 <sup>c</sup>                                            | Ala50, Leu40, , Leu36, Leu125, Ile92, Tyr47, Trp88, Tyr93, Tyr56 |
| 39             | 62.76 | 1 | Trp60                       | Asp73 <sup>d</sup>                                             | Ala127, Leu36, Leu40, Leu125, Trp88, Tyr47, Tyr64                |
| 40*            | 68.74 | 1 | Trp60                       | —                                                              | Ala127, Cys79, Leu36, Leu125, Trp88, Tyr47, Tyr64, , Val76       |
| 41*            | 73.63 | 1 | Tyr64                       | Arg61 <sup>f</sup> , Leu110 <sup>c</sup>                       | Ile92, Leu36, Leu125, Leu40, Tyr47, Tyr56, Tyr93, Val76          |
| 42             | 79.36 | 5 | Trp60, Tyr64                | Asp73 <sup>d</sup> , Leu110 <sup>c</sup> , Leu125 <sup>c</sup> | Ala50, Leu36, Leu140, Tyr56, Tyr93,                              |
| 5              | 43.27 | 1 | Arg61, Trp60                | Asp73 <sup>d</sup> , Tyr64 <sup>e</sup>                        | Ala105, Leu36, leu110, Phe101, Trp60                             |
| 3 <sup>g</sup> | 68.32 | 2 | Asp37, Ser129, Trp60, Tyr56 | —                                                              | Ala127, Cys79, Leu125                                            |
| 3 <sup>h</sup> | —     |   | Tyr56, Trp60, Asp73         | —                                                              | Trp88                                                            |

<sup>a</sup>The highest-ranked pose of the largest cluster was selected for analysis.

<sup>b</sup>Hydrophobic interactions include  $\pi$ - $\pi$  stacked and T-shaped, alkyl and  $\pi$ -alkyl and  $\pi$ -sigma; other interactions include <sup>c</sup>halogen and <sup>d</sup> $\pi$ -anion and <sup>e</sup> $\pi$ -lone pair; <sup>f</sup>unfavorable interaction; <sup>g</sup>Docked OdDHL, <sup>h</sup>OdDHL crystal structure.

# Spectra Data <sup>1</sup>H NMR and <sup>13</sup>C NMR Spectra

## 1) 1-butyl-3,4-dichloro-1,5-dihydro-2H-pyrrol-2-one (Compound 9)

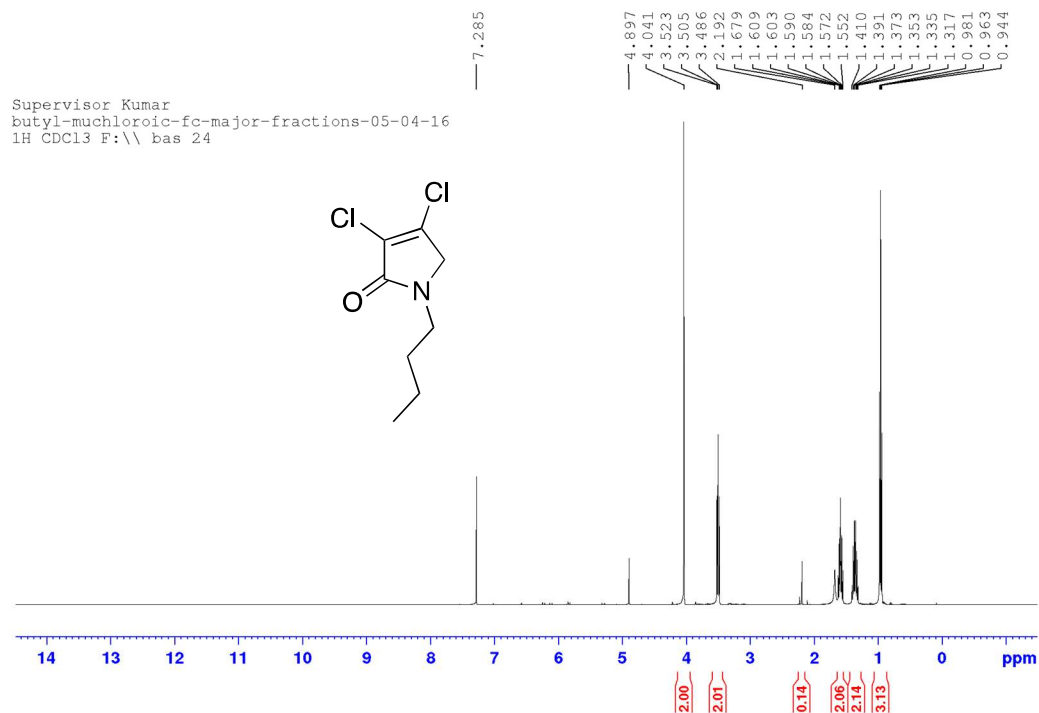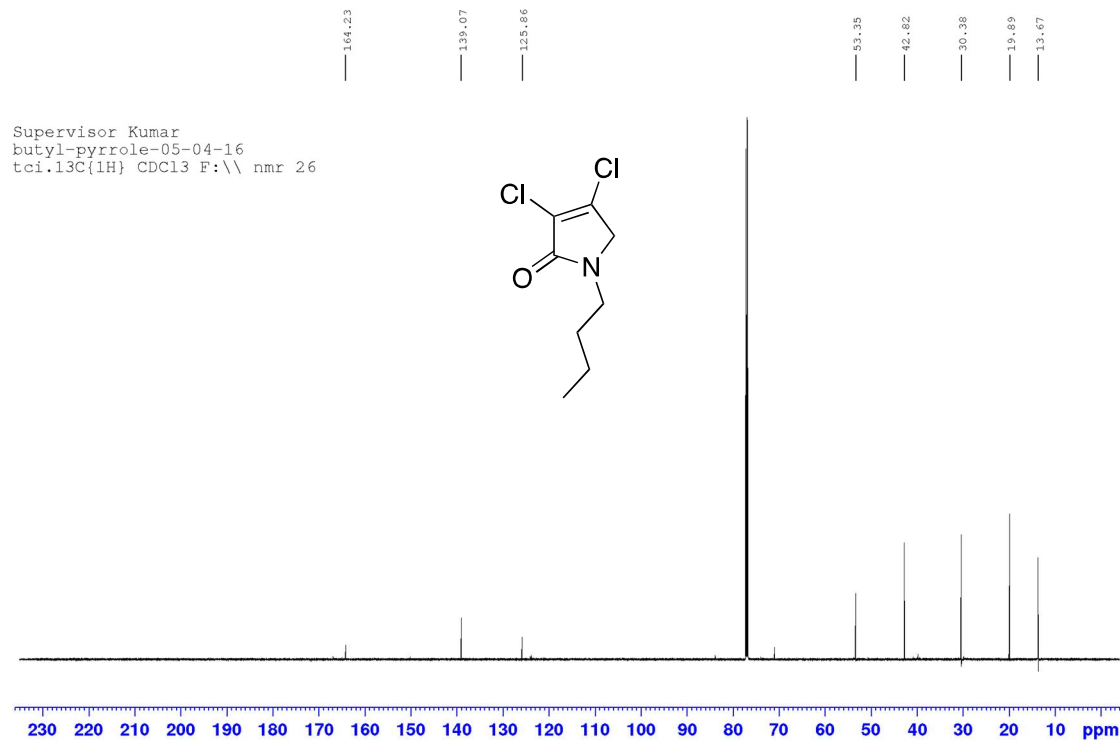

2) 3,4-dichloro-1-hexyl-1,5-dihydro-2H-pyrrol-2-one (Compound 10)

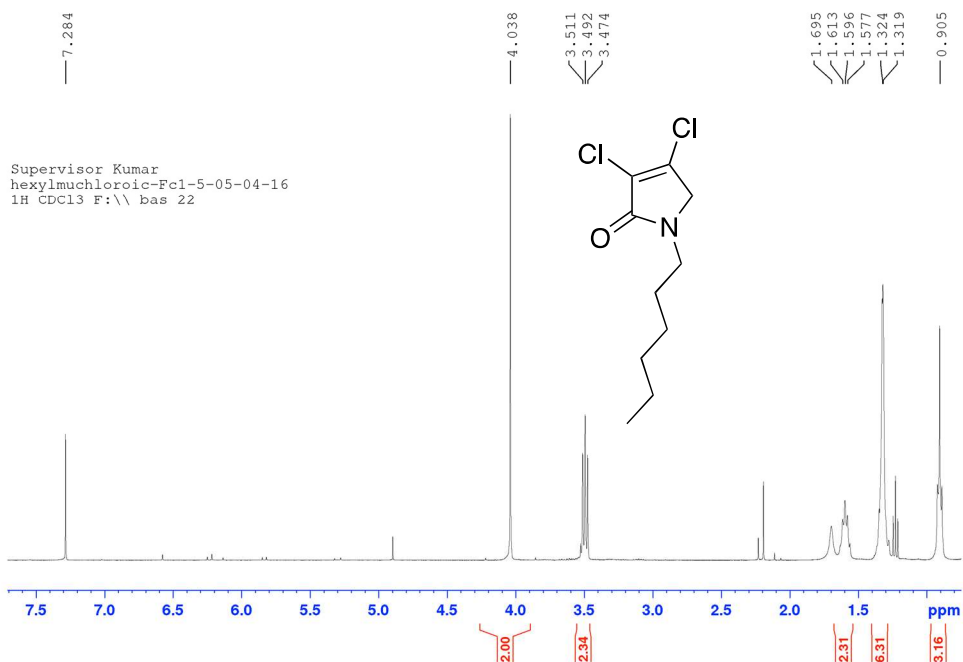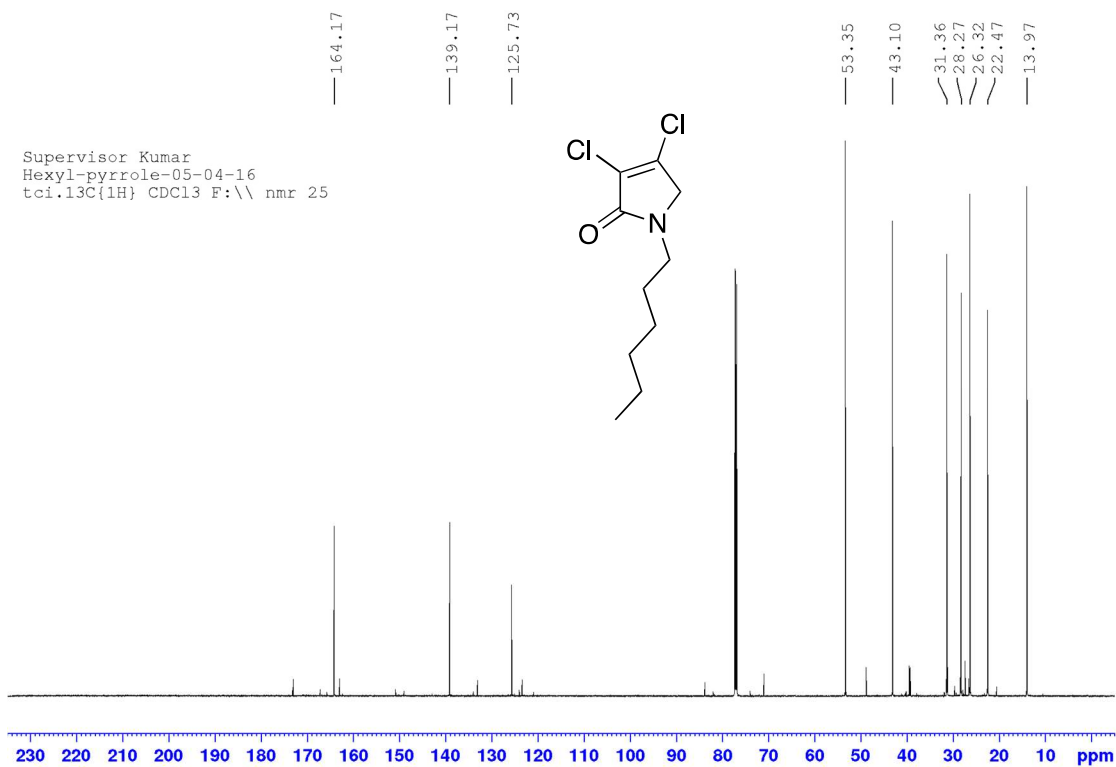

3) 3,4-dichloro-1-(2-hydroxyphenyl)-1,5-dihydro-2H-pyrrol-2-one  
(Compound 12)

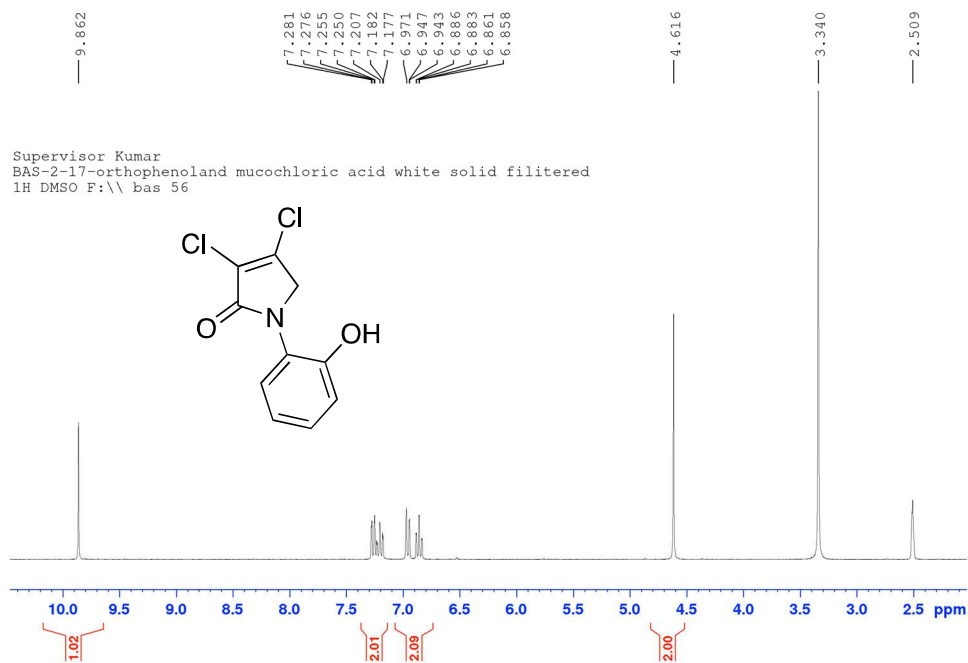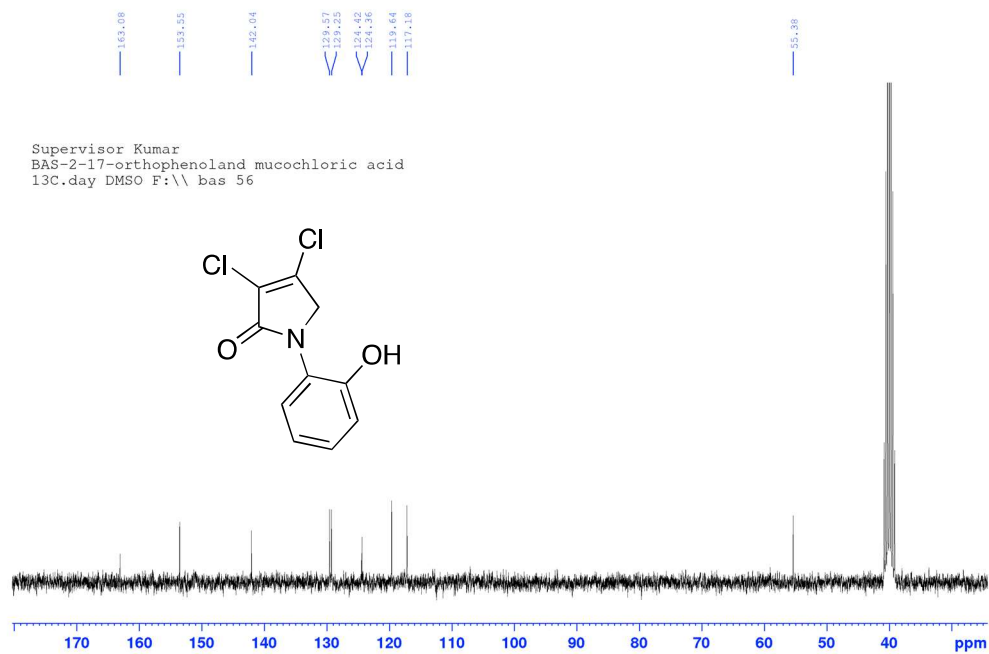



#### 4) 3,4-dichloro-1-(3-hydroxyphenyl)-1,5-dihydro-2H-pyrrol-2-one (Compound 13)

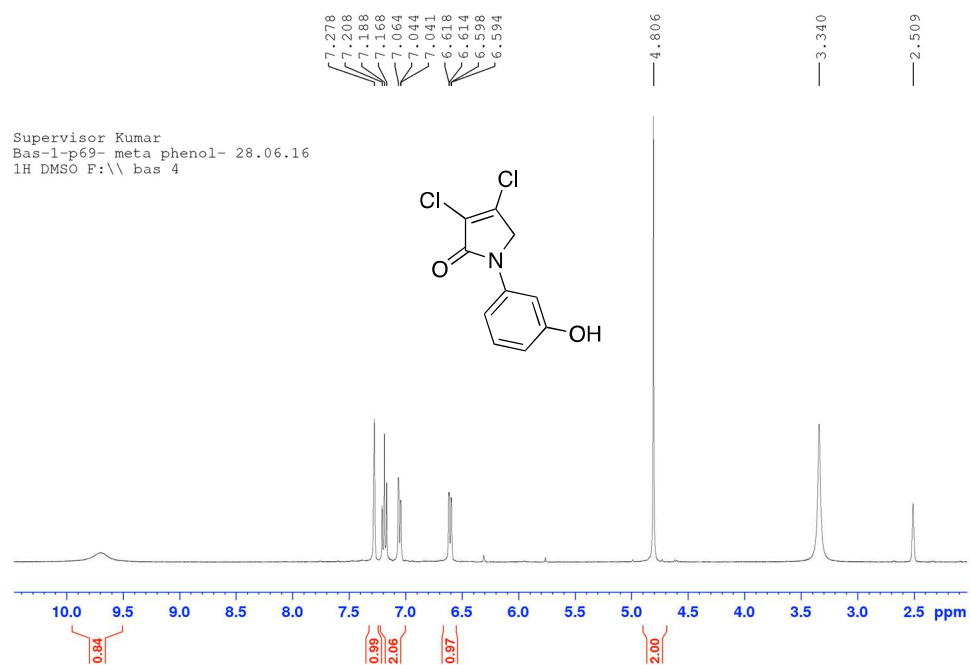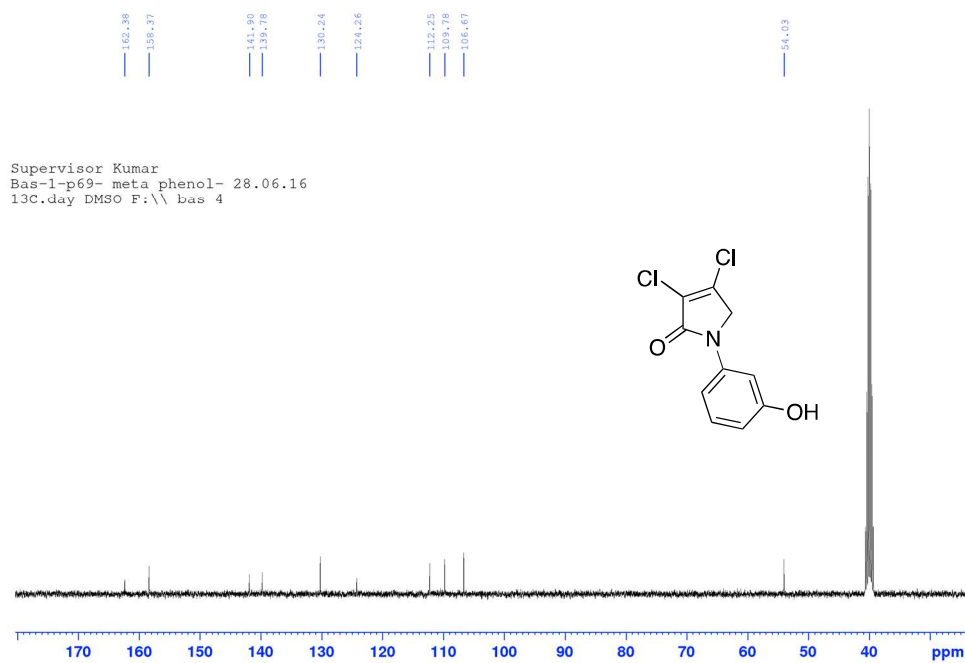

### 5) 3,4-dichloro-1-(4-hydroxyphenyl)-1,5-dihydro-2H-pyrrol-2-one (Compound 14)

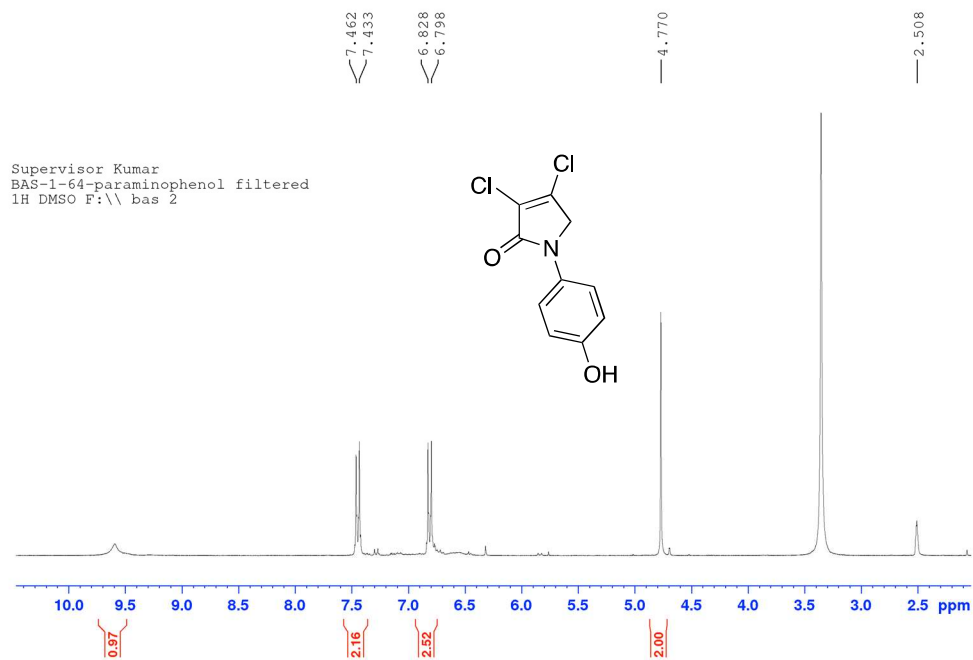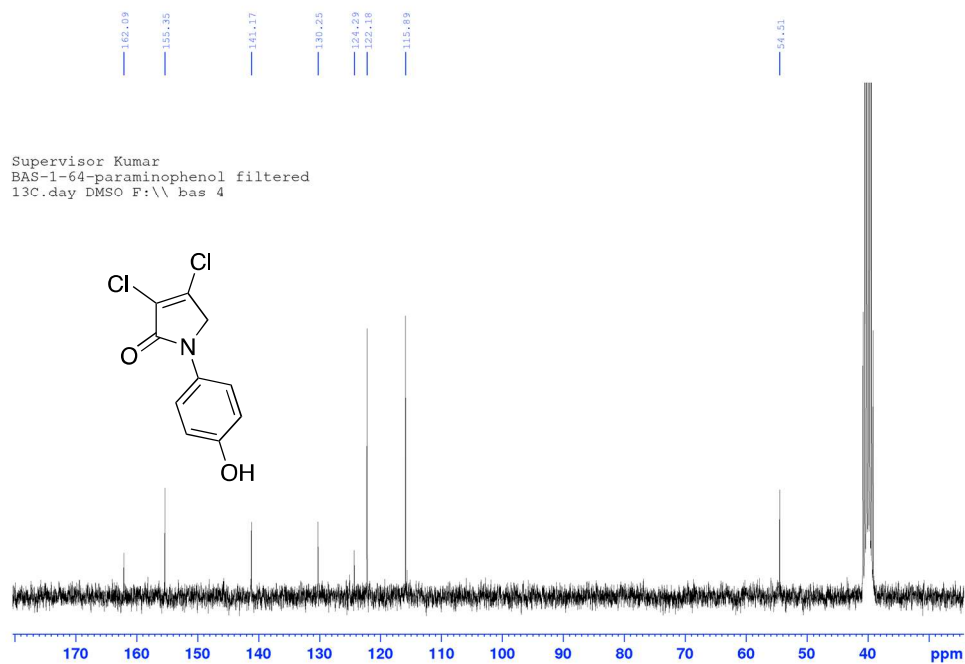

6) N-(3-carboxyphenyl)-3,4-dibromo-1,5-dihydro-2H-pyrrol-2-one (DHP phenyl acid-2) (Compound 15)

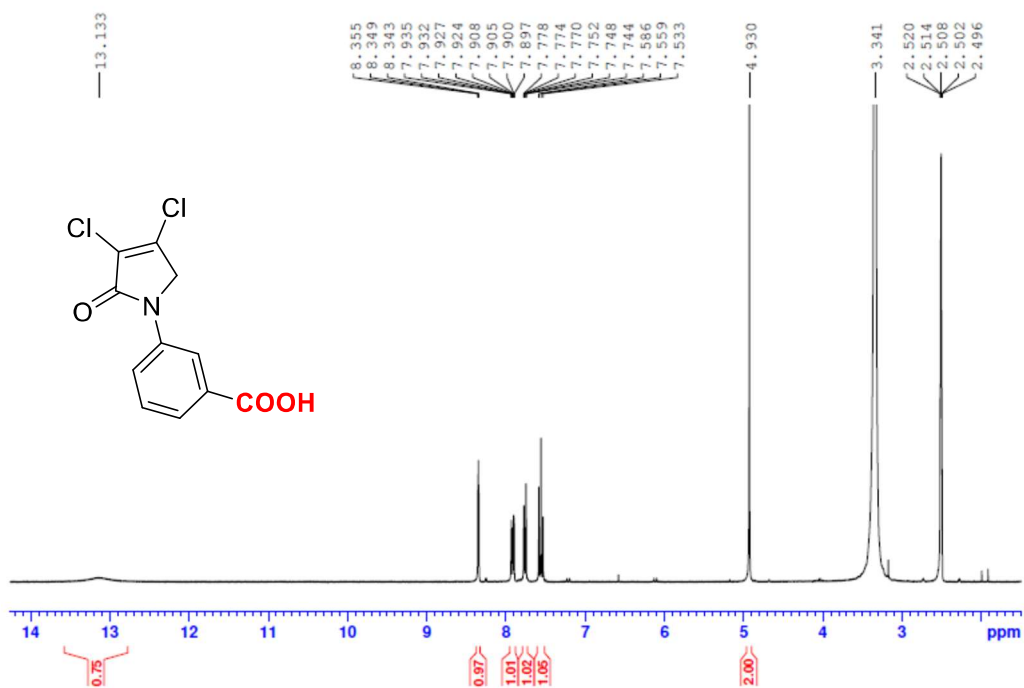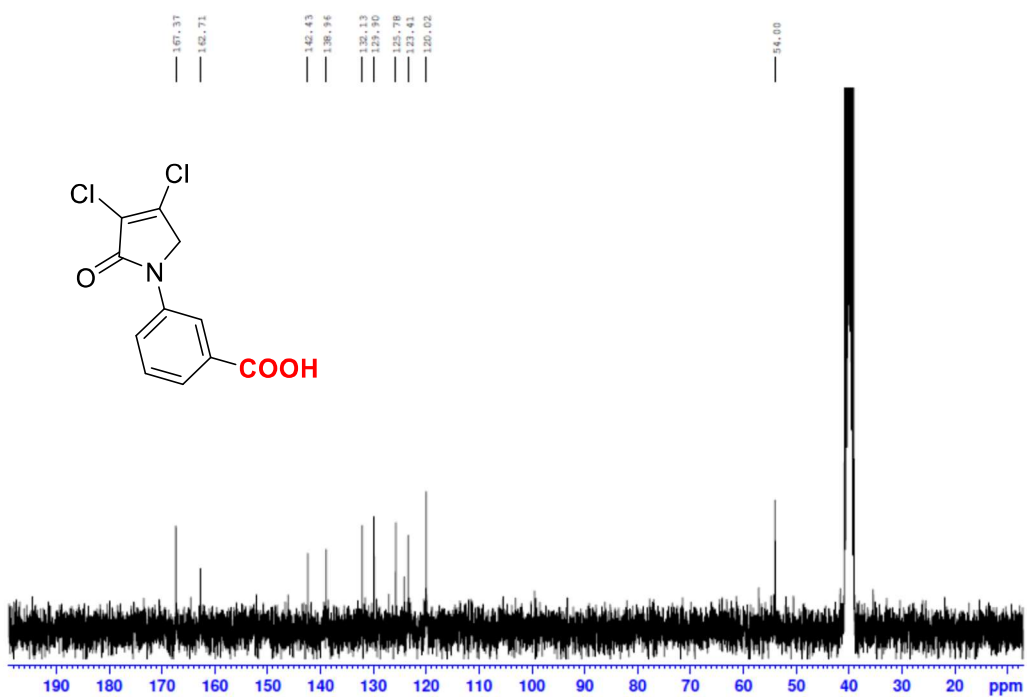

7) N-(4-carboxyphenyl)-3,4-dichloro-1,5-dihydro-2H-pyrrol-2-one (DHP phenyl acid-1) (Compound 16)

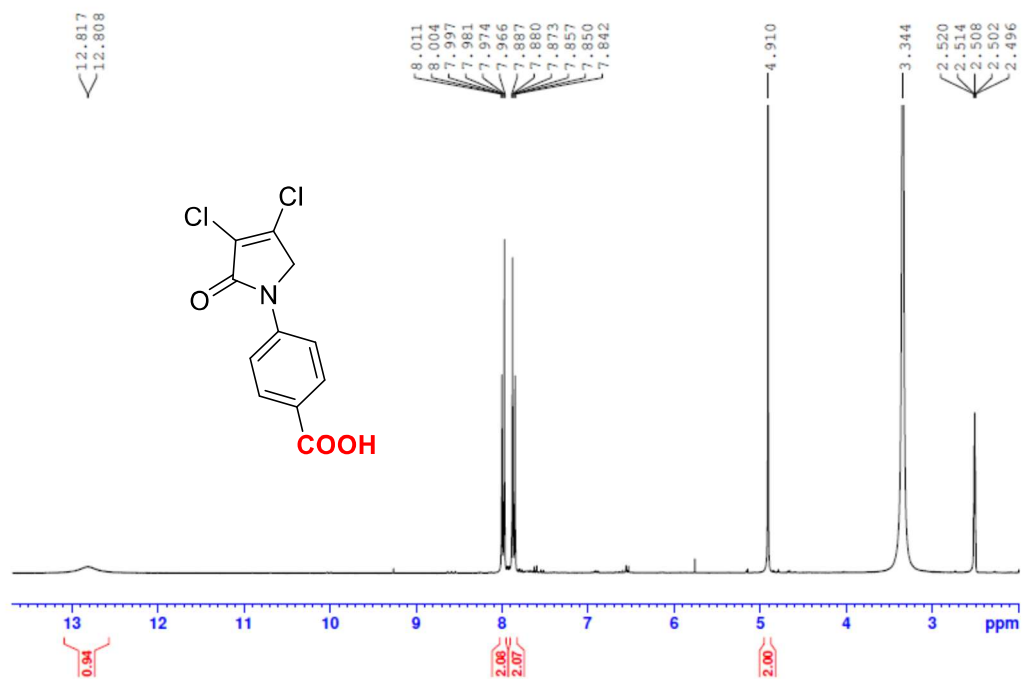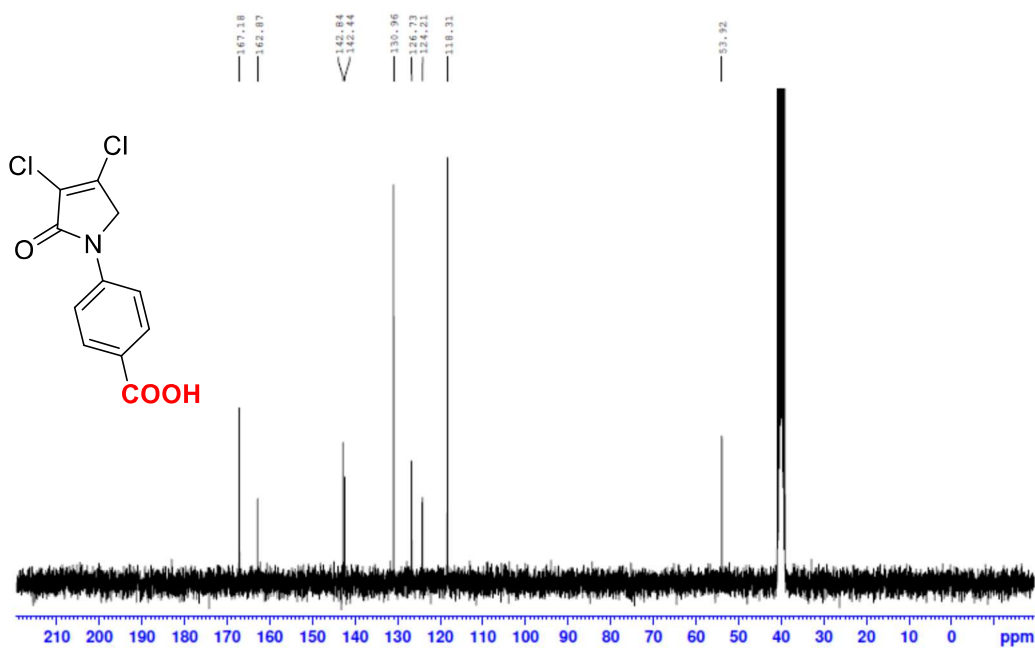

# 8) N-(3-tert-butylphenylcarbamate)-3,4-dichloro-1,5-dihydro-2H-pyrrol-2-one (Compound 17)

Supervisor Kumar  
meta-N-NH-BOC-PHENYL

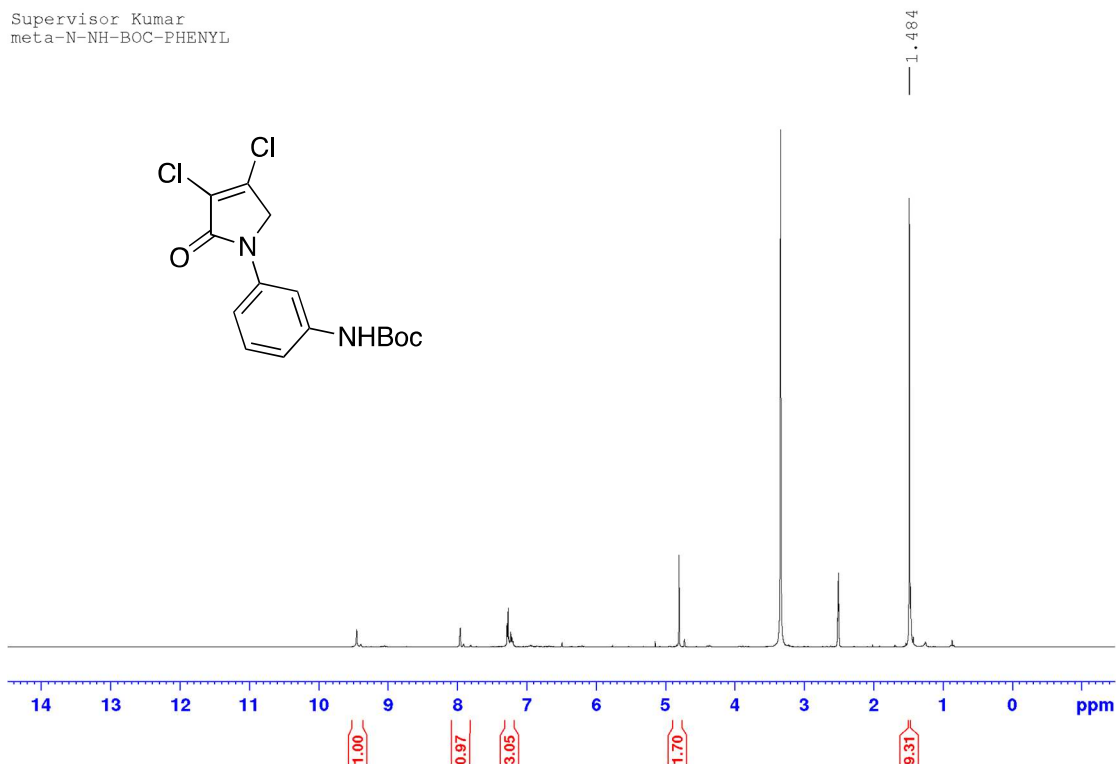

Supervisor Kumar  
meta N-NH-BOC-PHENYL

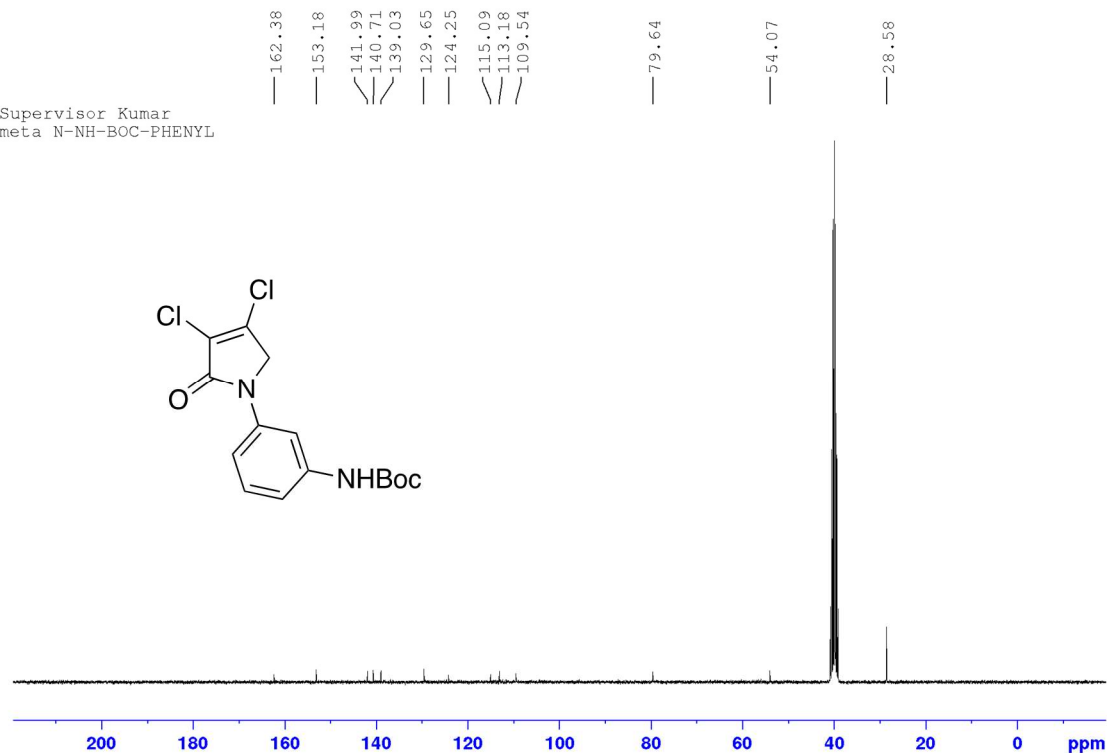

9) N-(4'-tert-butylphenylcarbamate)-3,4-dichloro-1,5-dihydro-2H-pyrrol-2-one (Compound 18)

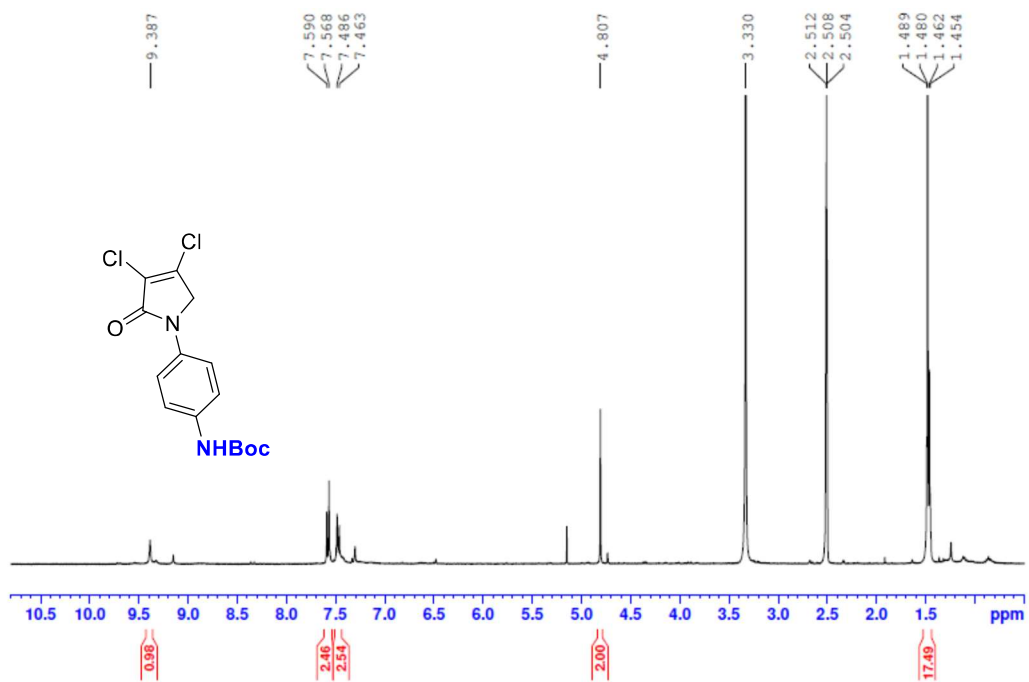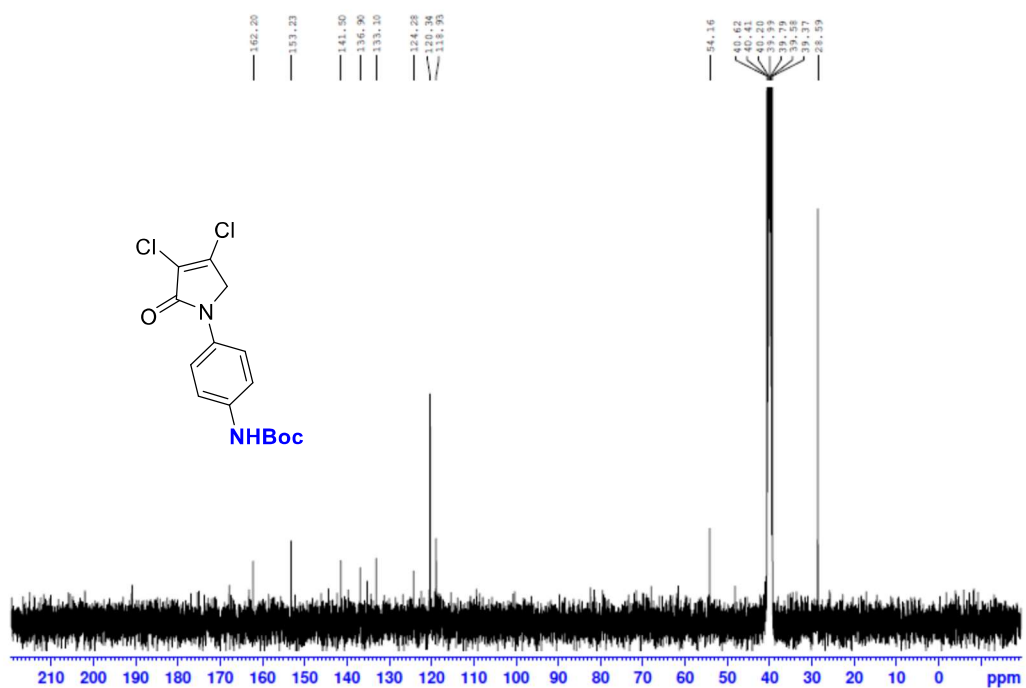

10) N-(3-aminophenyl)-3,4-dichloro-1,5-dihydro-2H-pyrrol-2-one  
(compound 19)

Supervisor Kumar  
N-3-aminophenyl

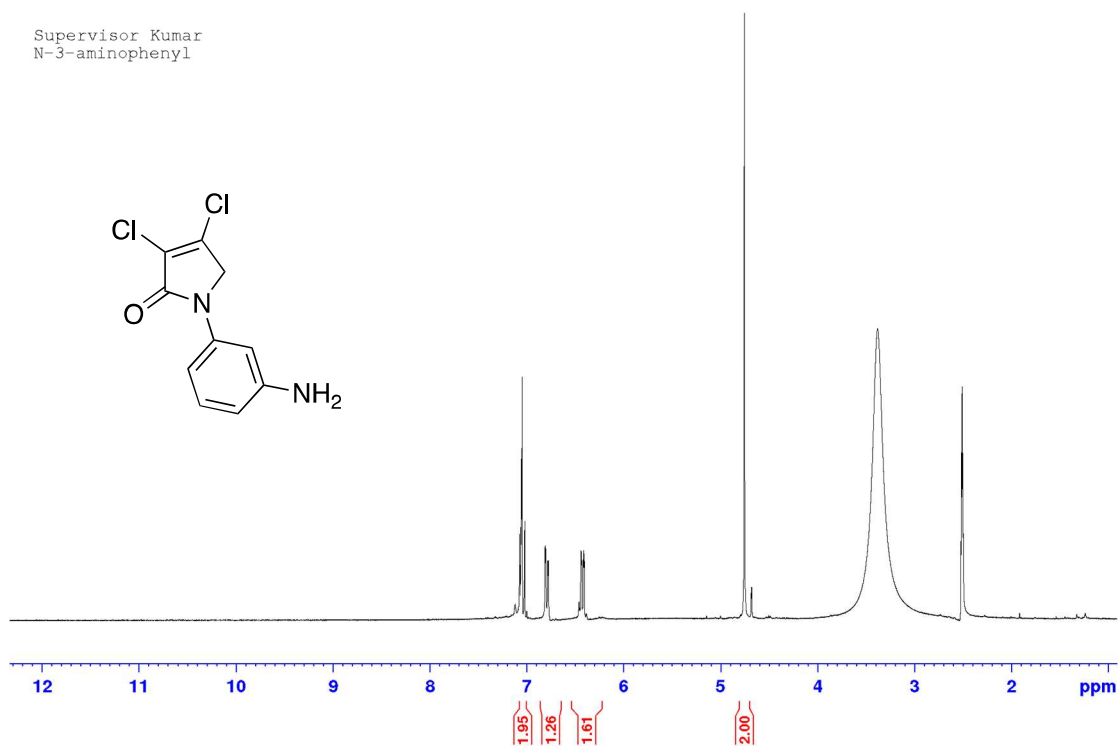

162.25  
149.08  
141.62  
139.48  
129.87  
124.31  
111.45  
107.33  
105.41  
54.06

Supervisor Kumar  
N-3-aminophenyl

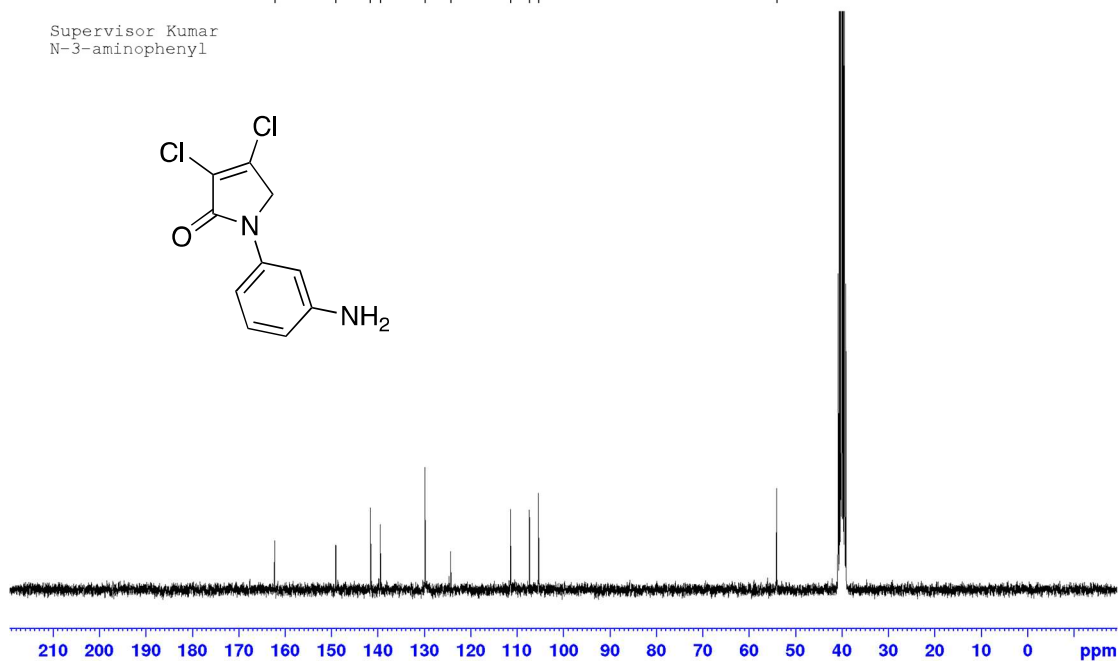

11) N-(4-aminophenyl)-3,4-dichloro-1,5-dihydro-2H-pyrrol-2-one  
(Compound 20)

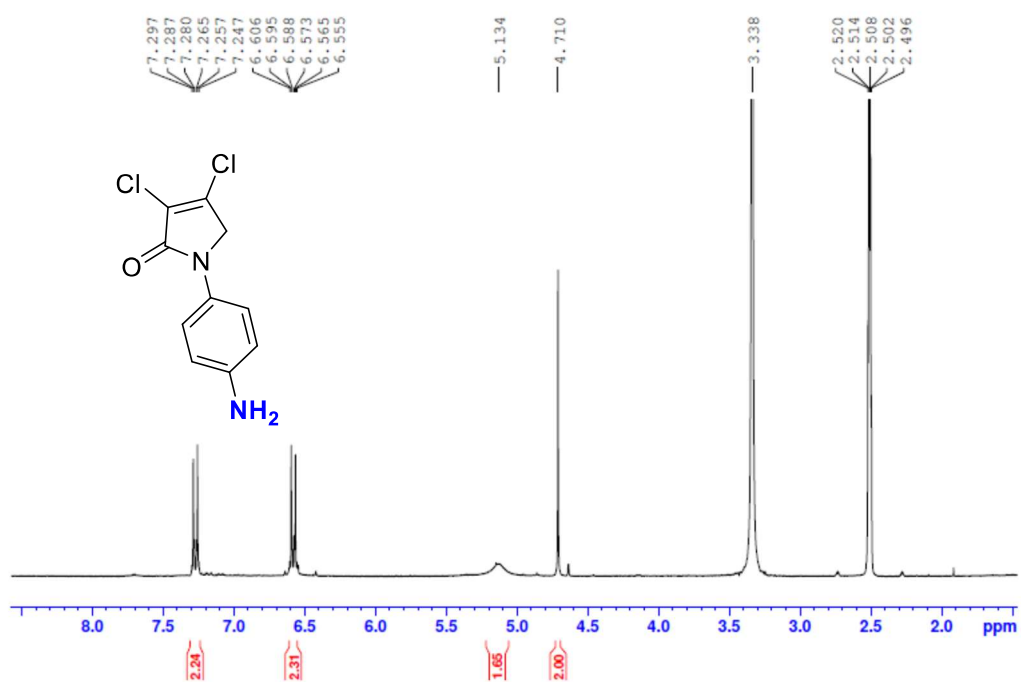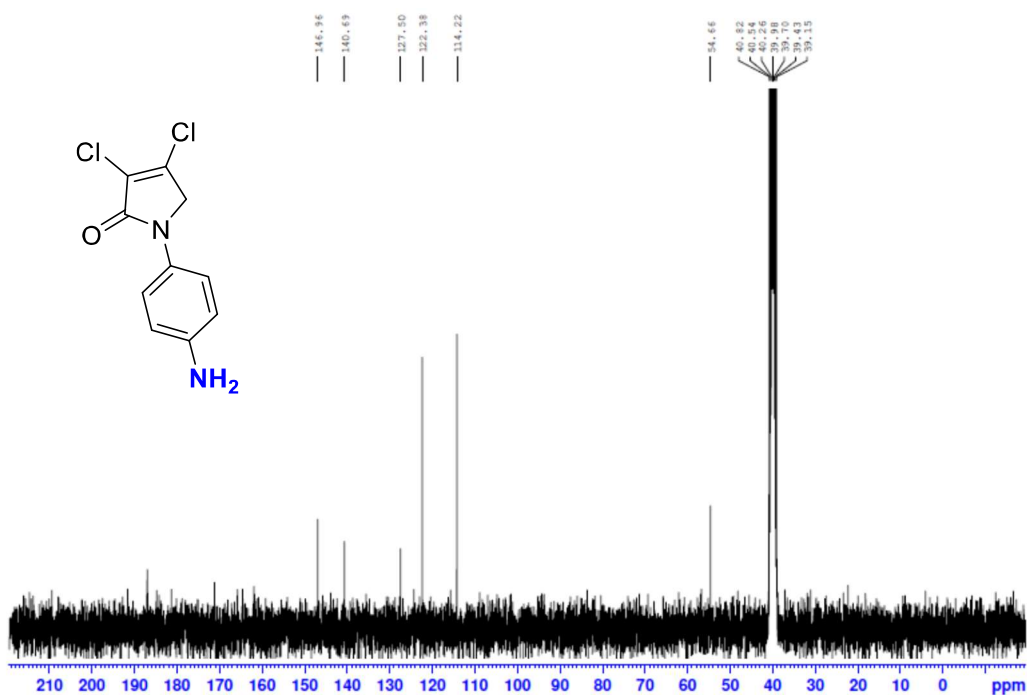



12) 4-(3,4-dichloro-2-oxo-2,5-dihydro-1H-pyrrol-1-yl)butanoic acid  
(Compound 21)

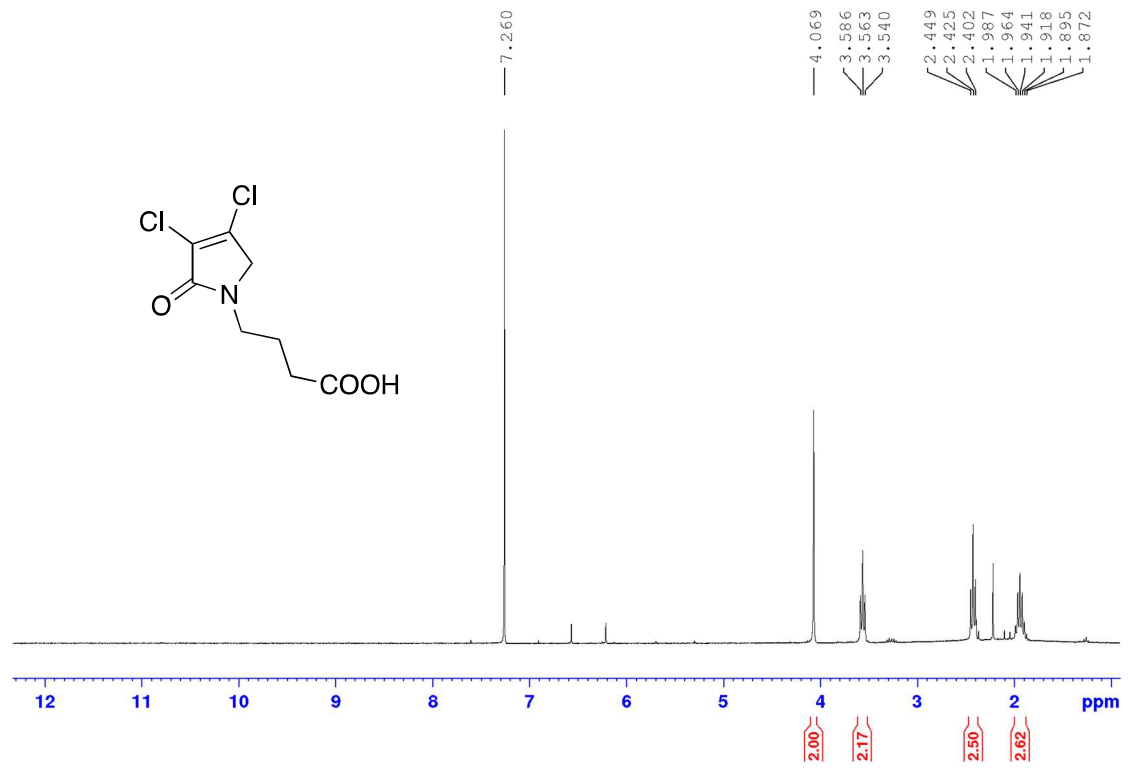

Supervisor Kumar  
MC-gaba-COOH-Final  
13C.night CDCl3 F:\ata 11

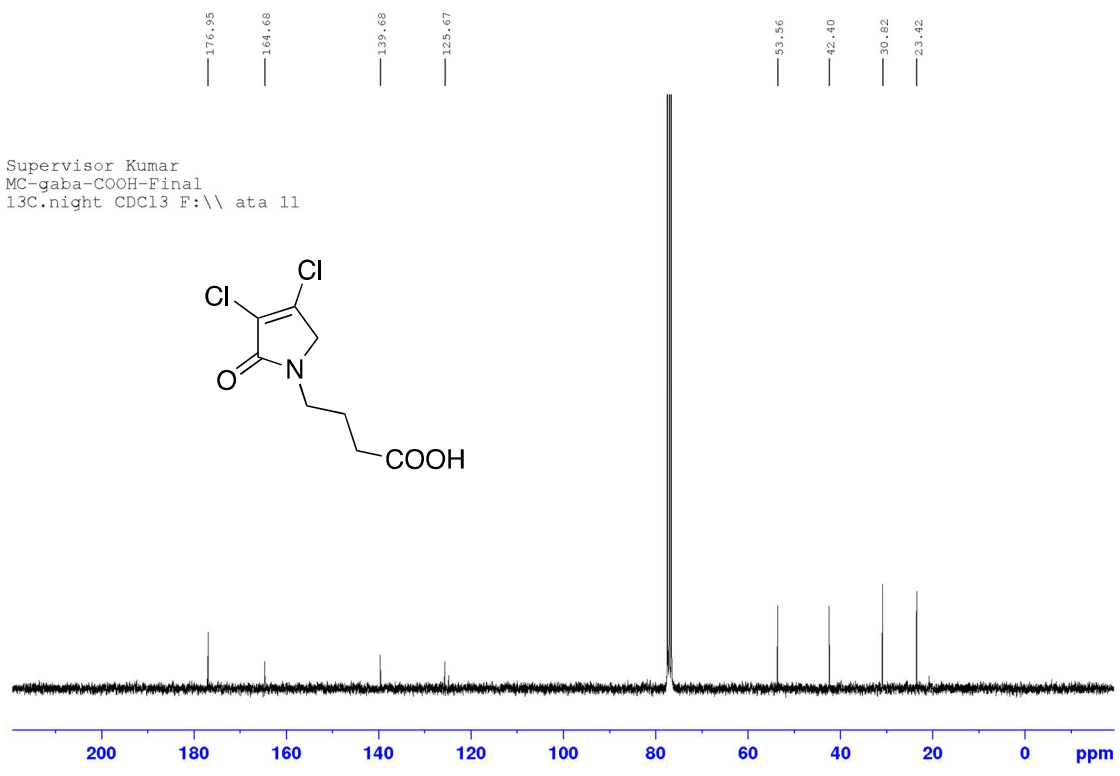

### 13) 1-allyl-3,4-dichloro-1,5-dihydro-2H-pyrrol-2-one (Compound 22)

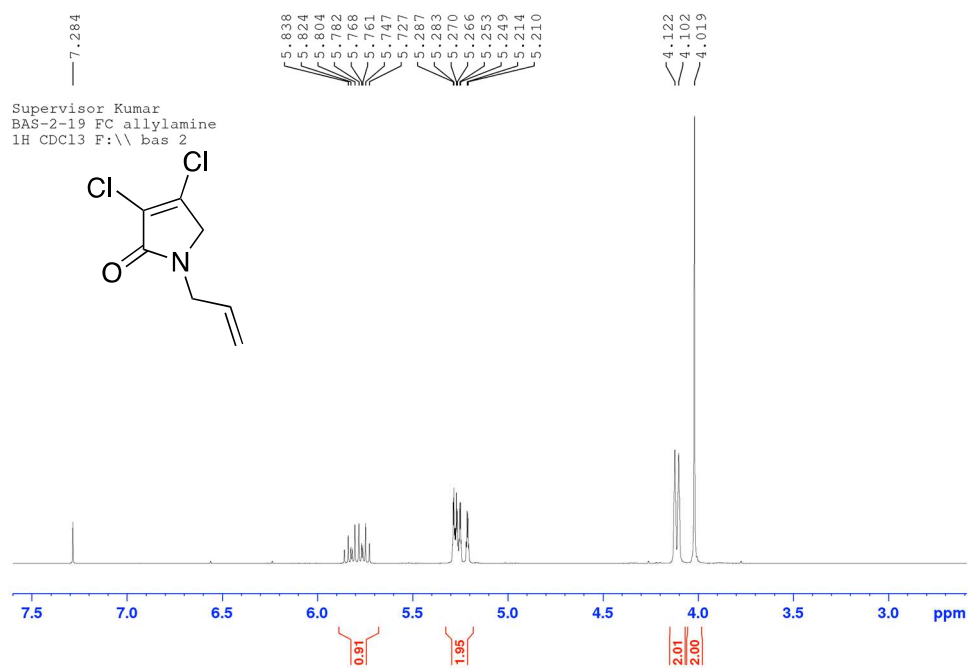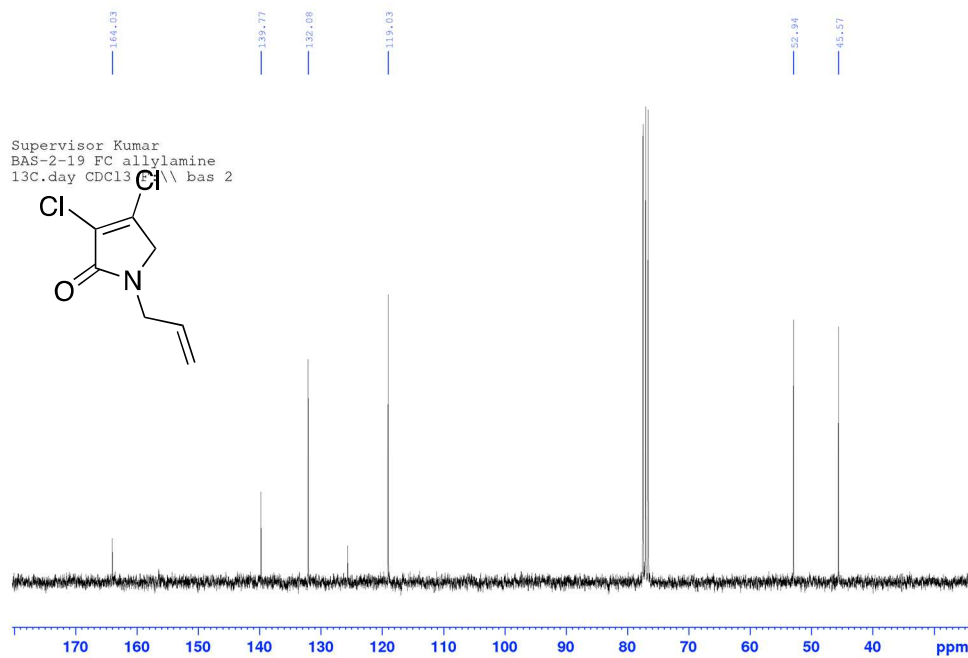

# 14) 3,4-dichloro-1-phenyl-1,5-dihydro-2H-pyrrol-2-one (Compound 23)

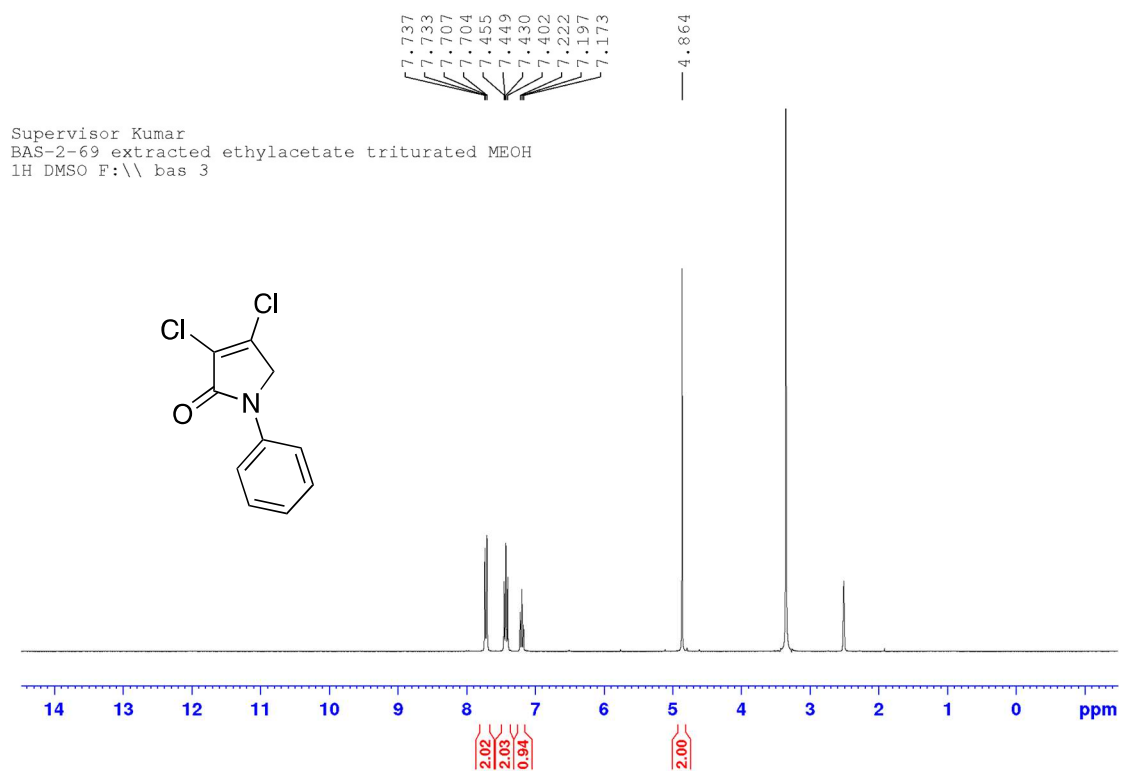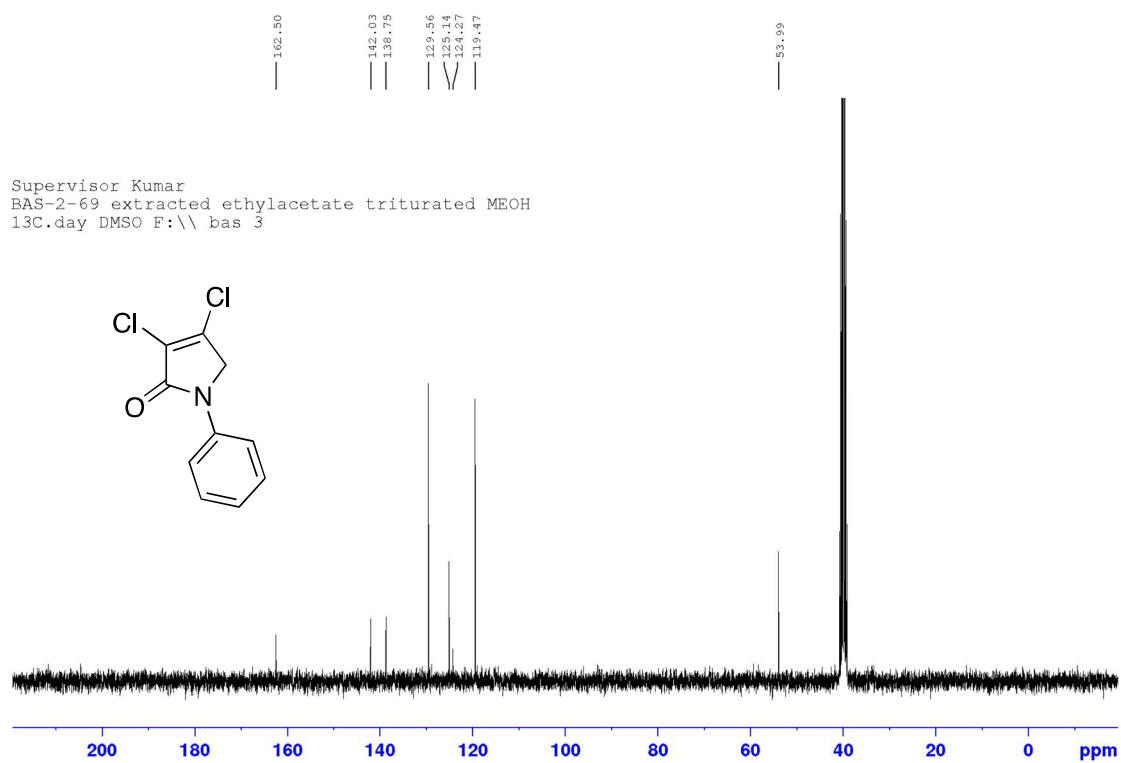

# 15) 3,4-dibromo-1-phenyl-1,5-dihydro-2H-pyrrol-2-one (Compound 24)

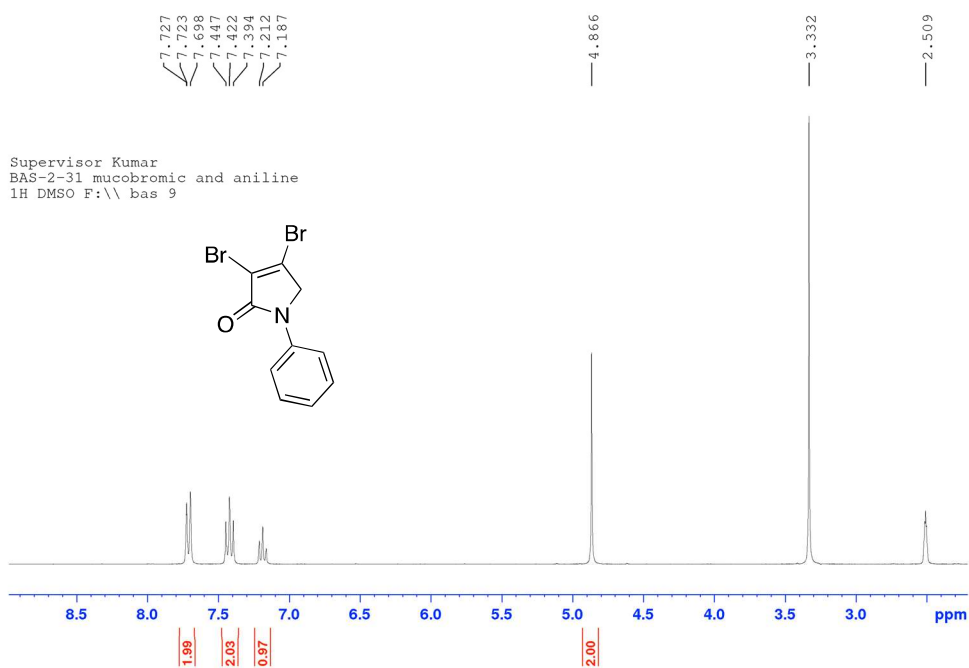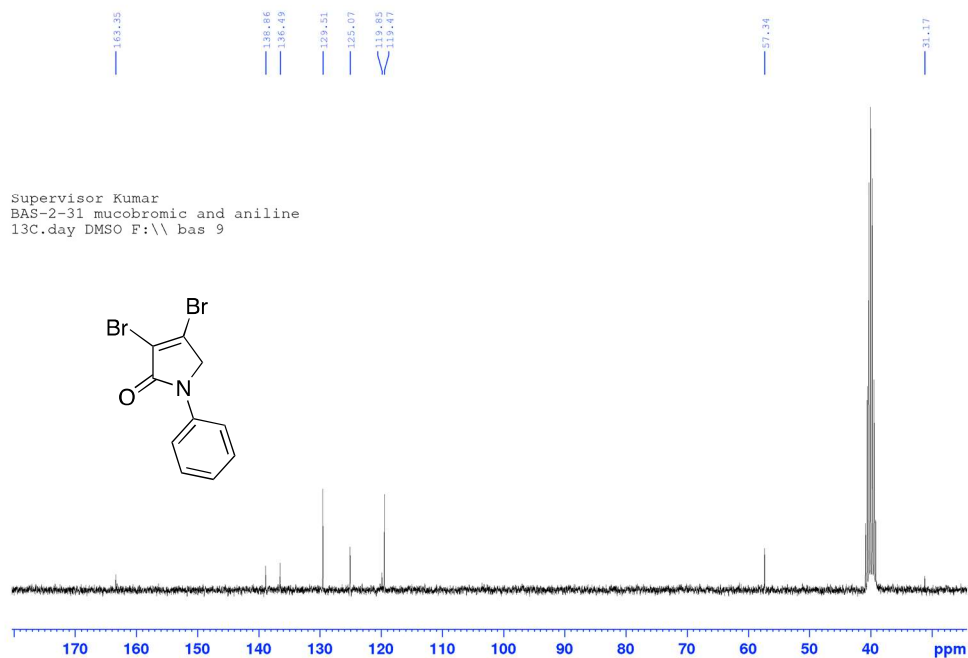

16) 3,4-dibromo-1-(3-hydroxyphenyl)-1,5-dihydro-2H-pyrrol-2-one  
(Compound 25)

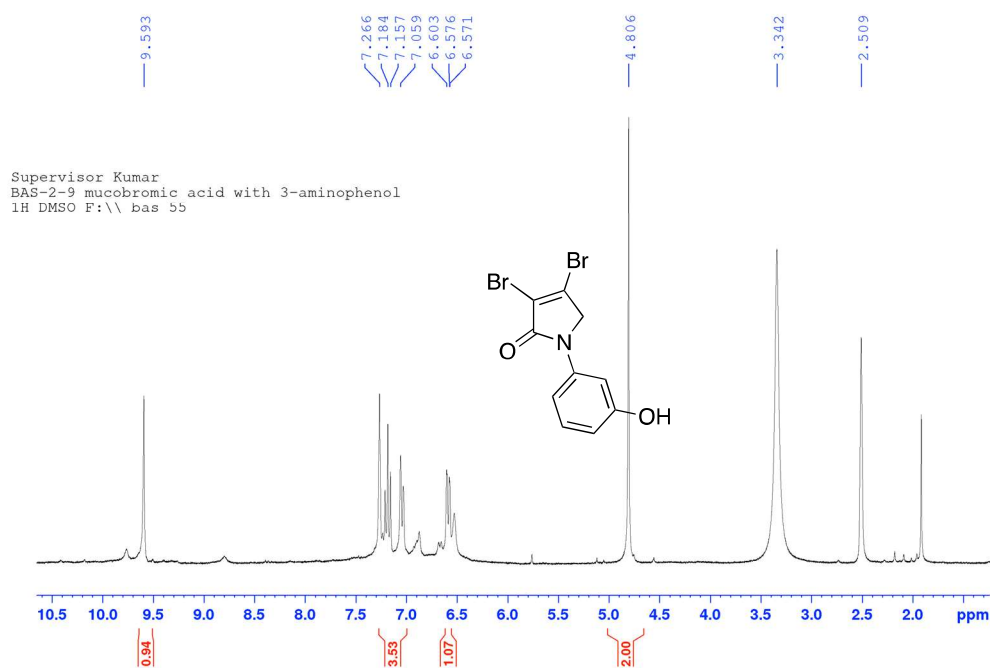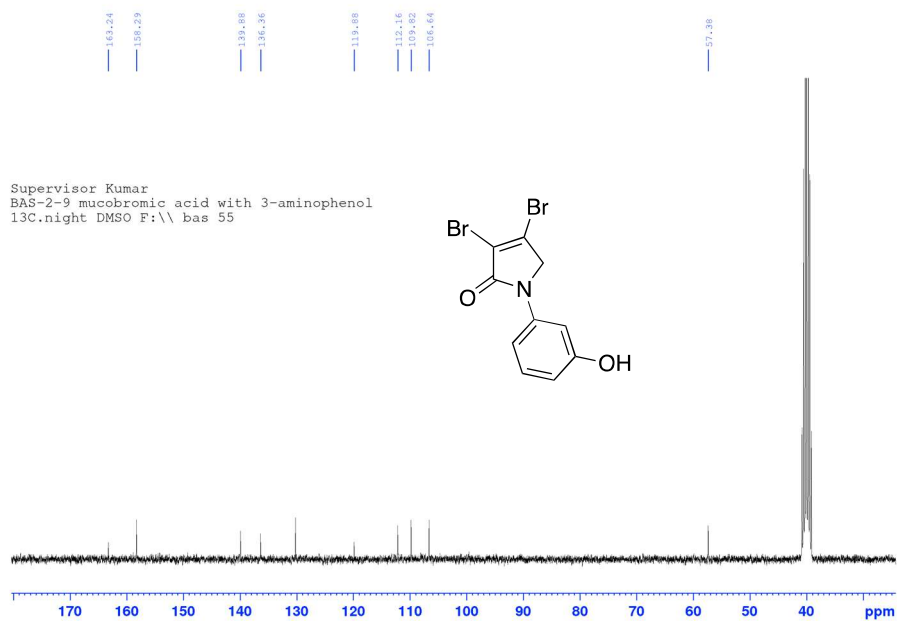

17) N-(3-carboxyphenyl)-3,4-dichloro-1,5-dihydro-2H-pyrrol-2-one  
(Compound 26)

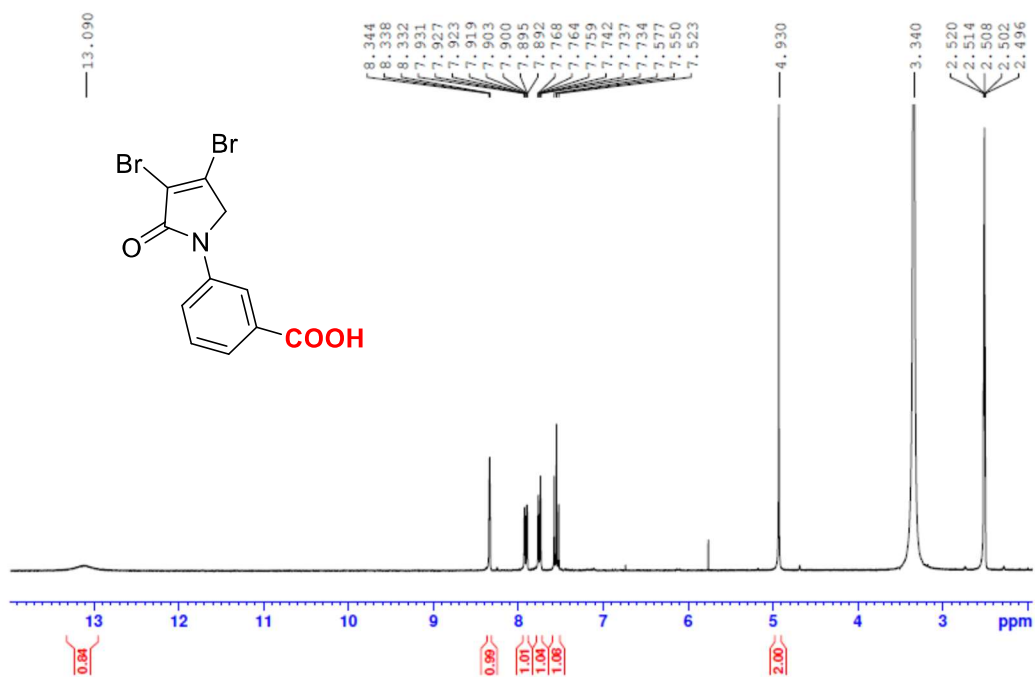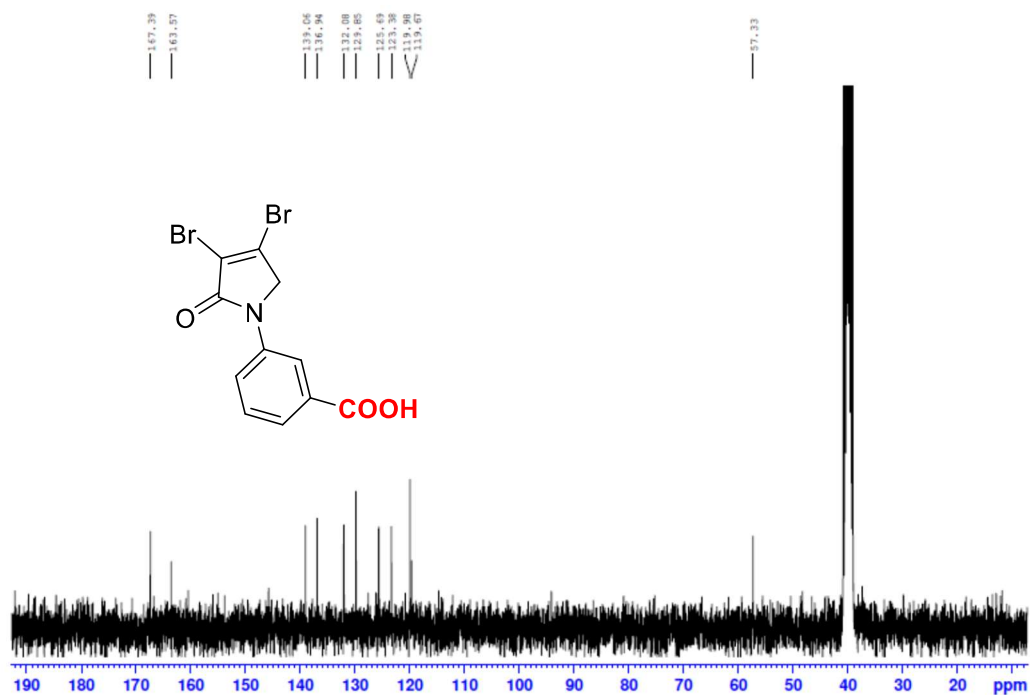

18) N-(4-carboxyphenyl)-3,4-dichloro-1,5-dihydro-2H-pyrrol-2-one  
(Compound 27)

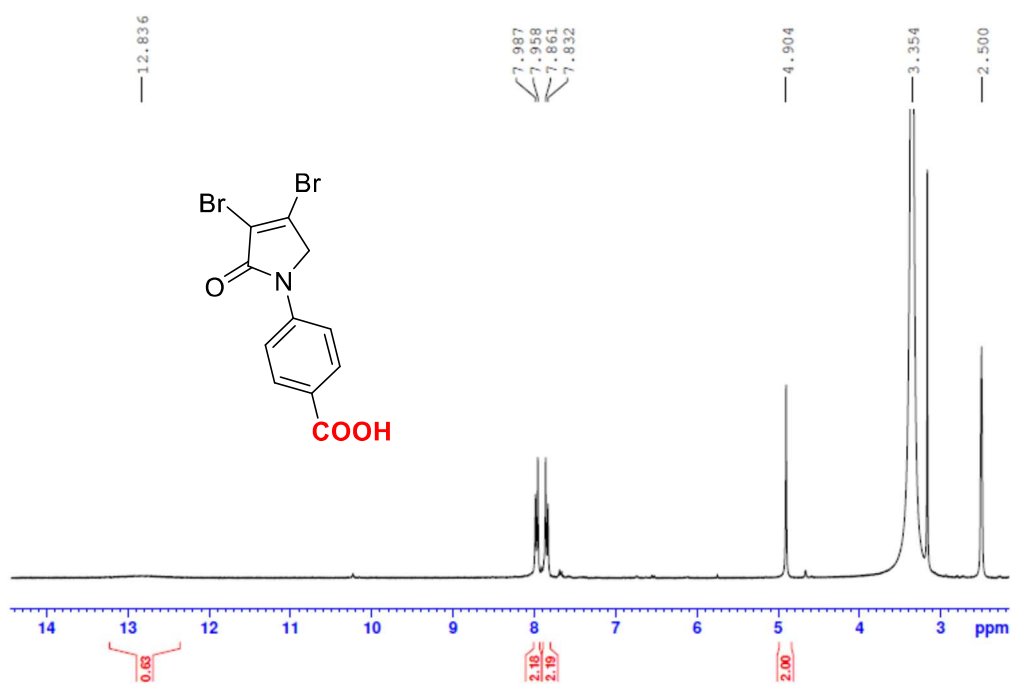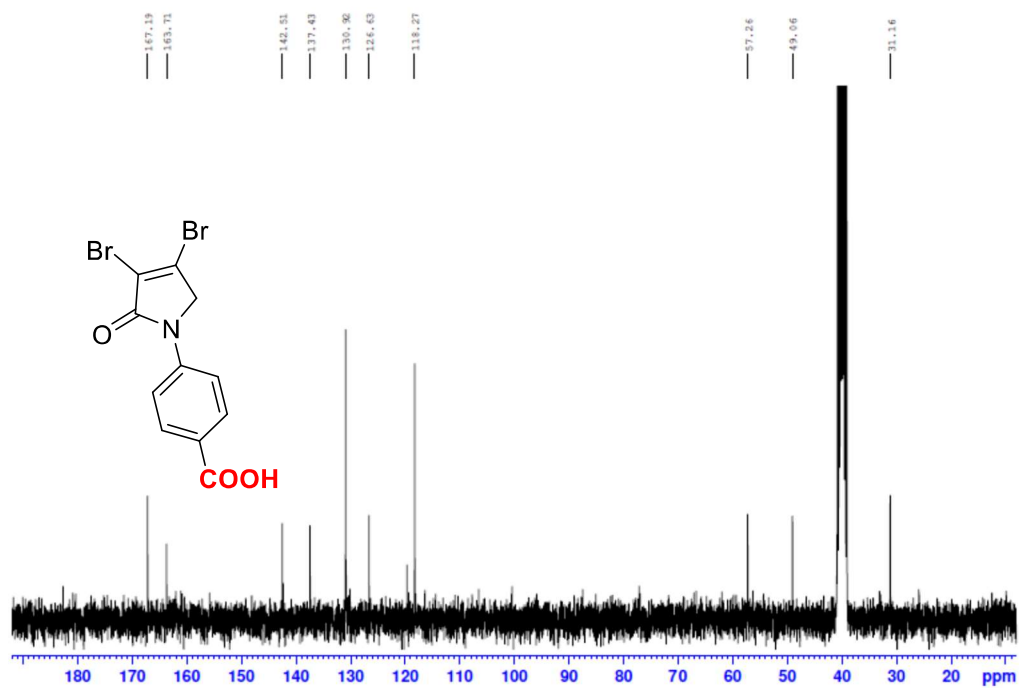

19) N-(4'-tert-butylphenylcarbamate)-3,4-dibromo-1,5-dihydro-2H-pyrrol-2-one (Compound 28)

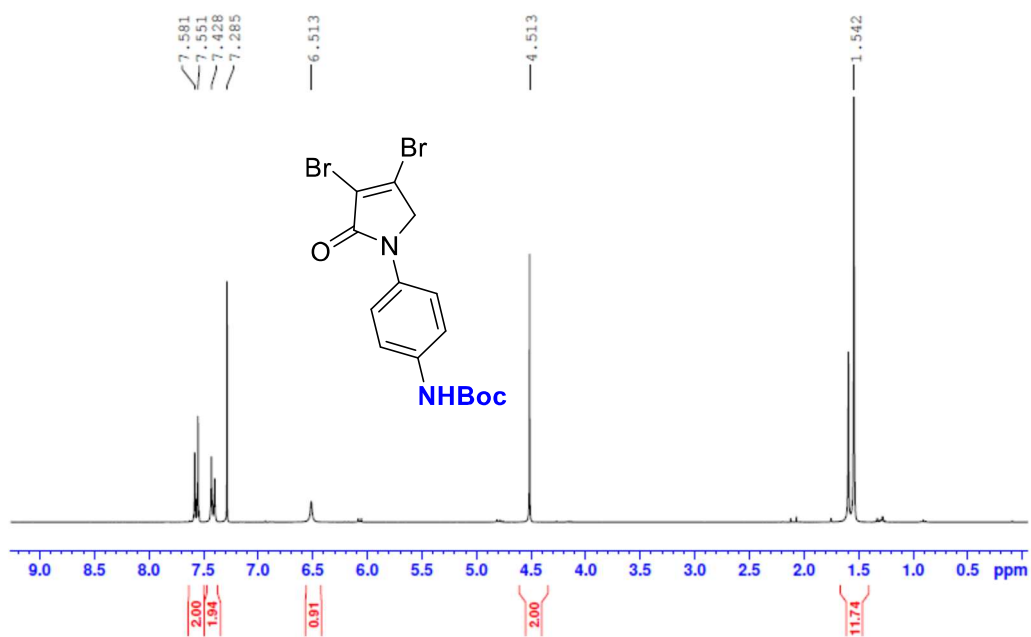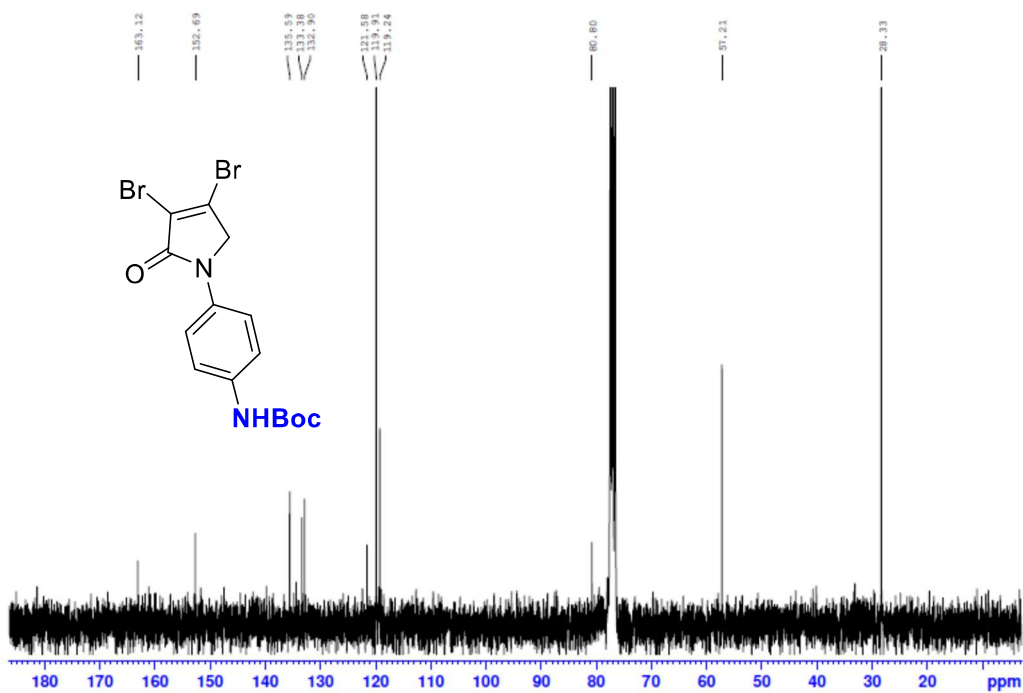



20) N-(4-aminophenyl)-3,4-dibromo-1,5-dihydro-2H-pyrrol-2-one (DHP phenyl amine-2) (Compound 29)

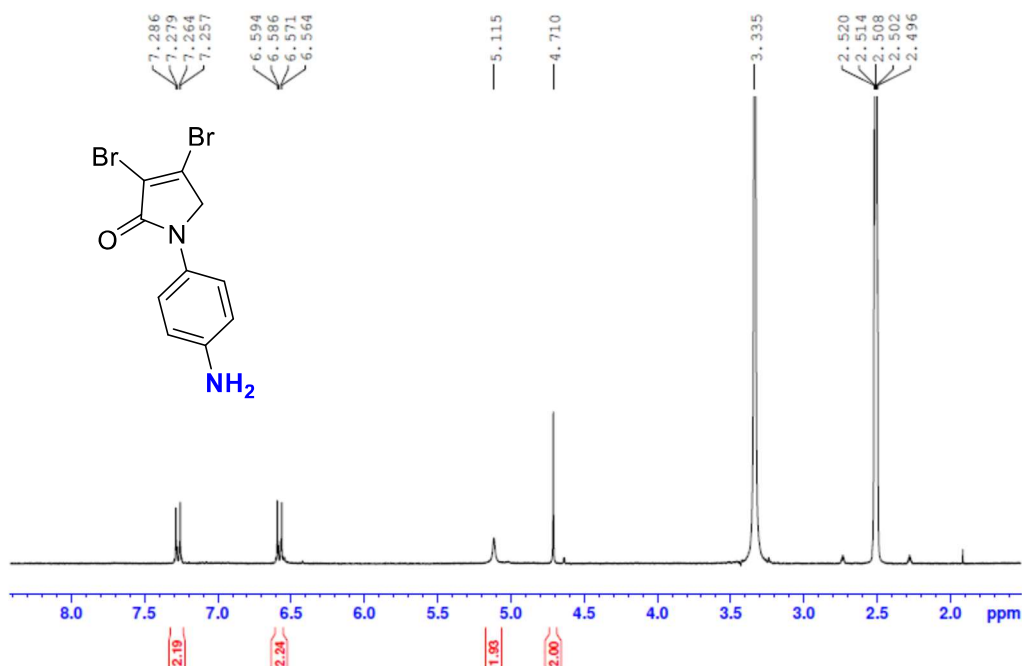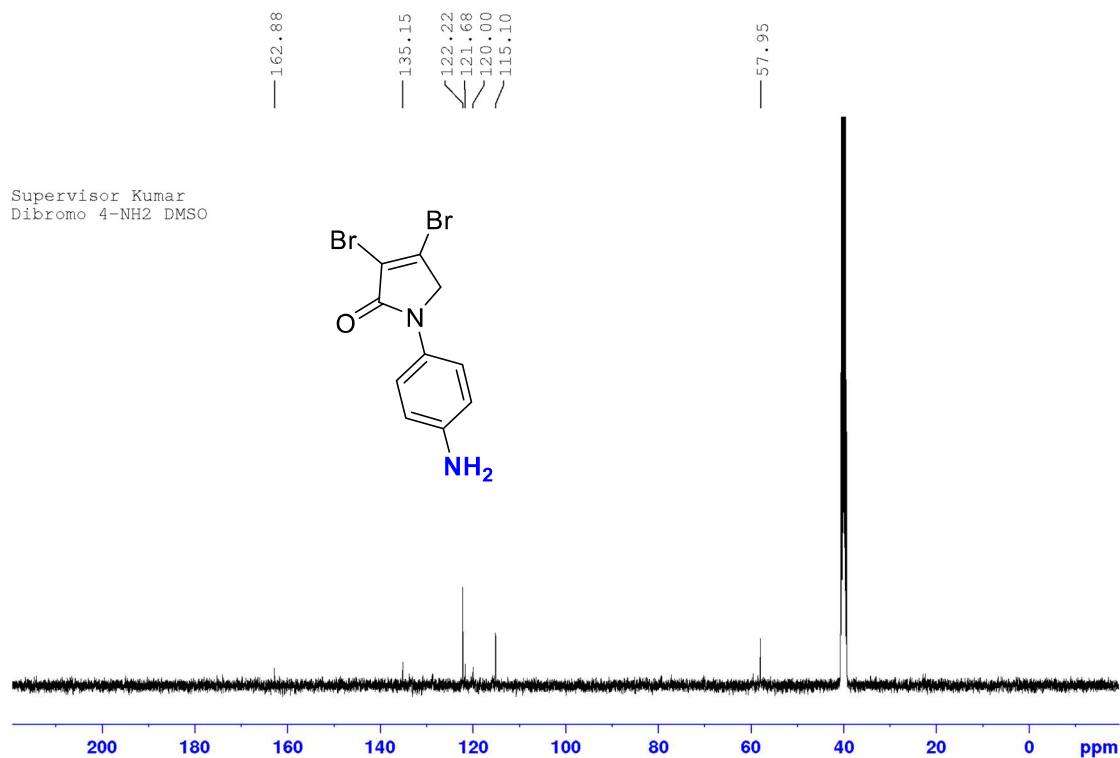

21) 3,4-dichloro-1-(4-hydroxyphenethyl)-1,5-dihydro-2H-pyrrol-2-one  
(Compound 30)

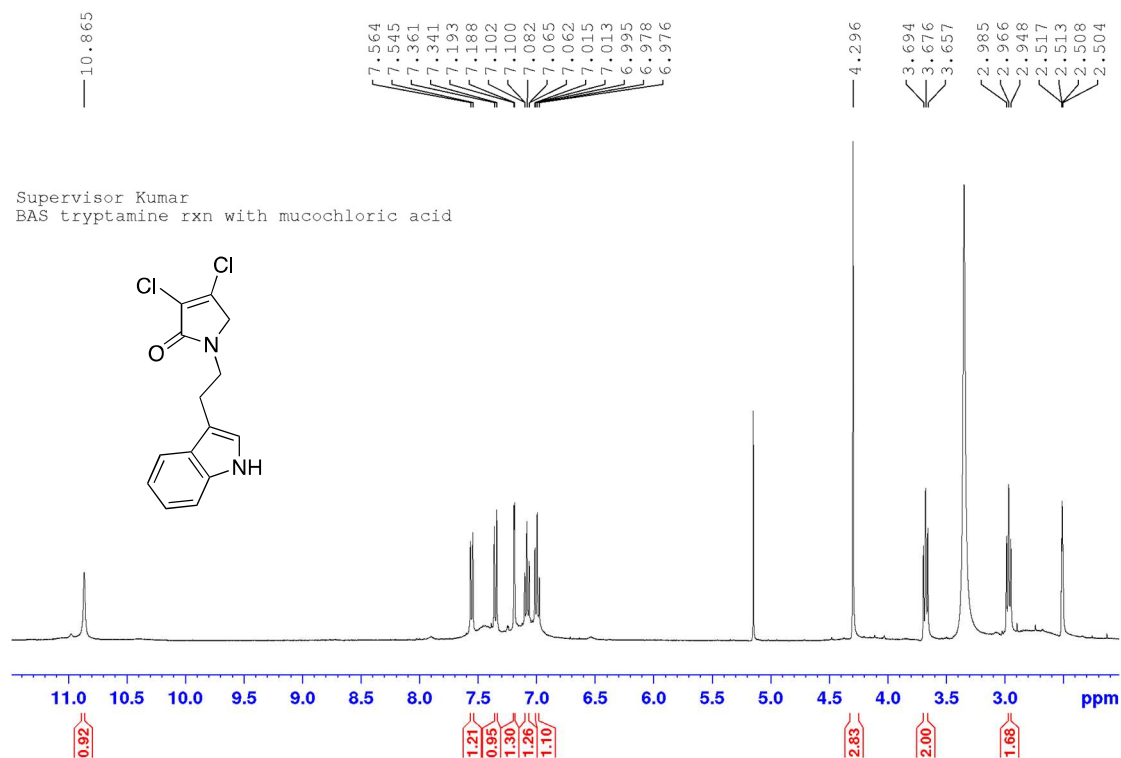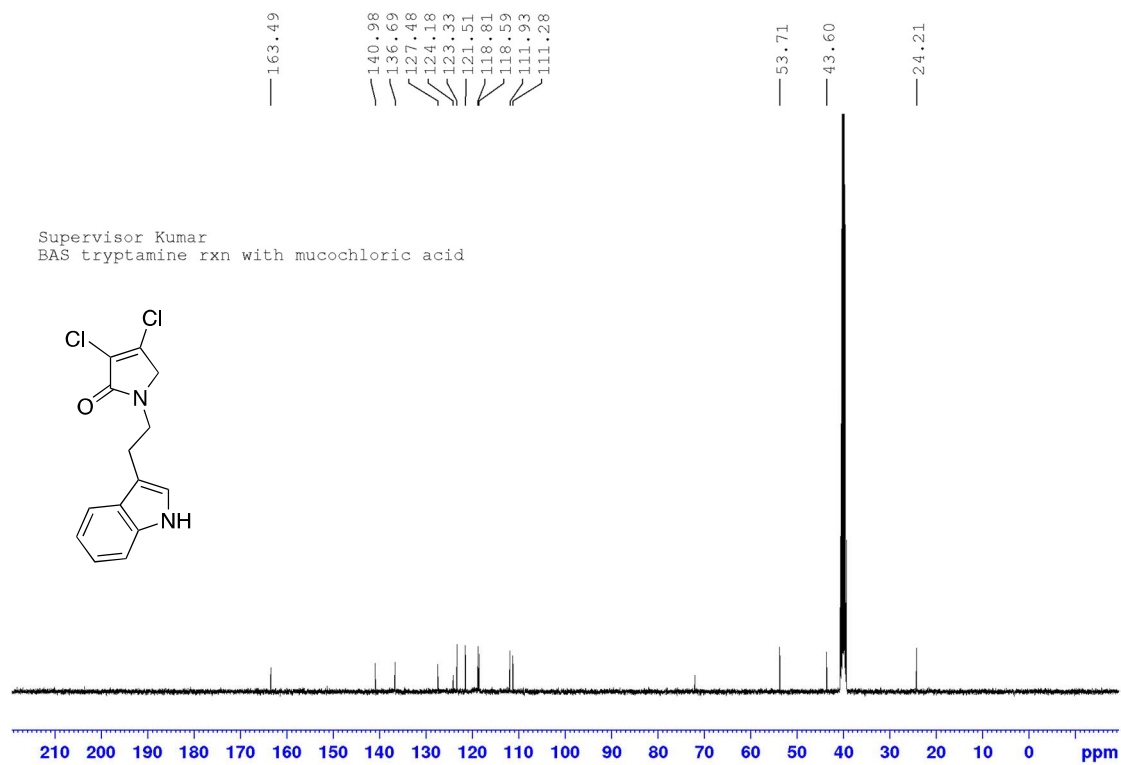

22) 1-(2-(1H-indol-3-yl)ethyl)-3,4-dichloro-1,5-dihydro-2H-pyrrol-2-one  
(Compound 31)

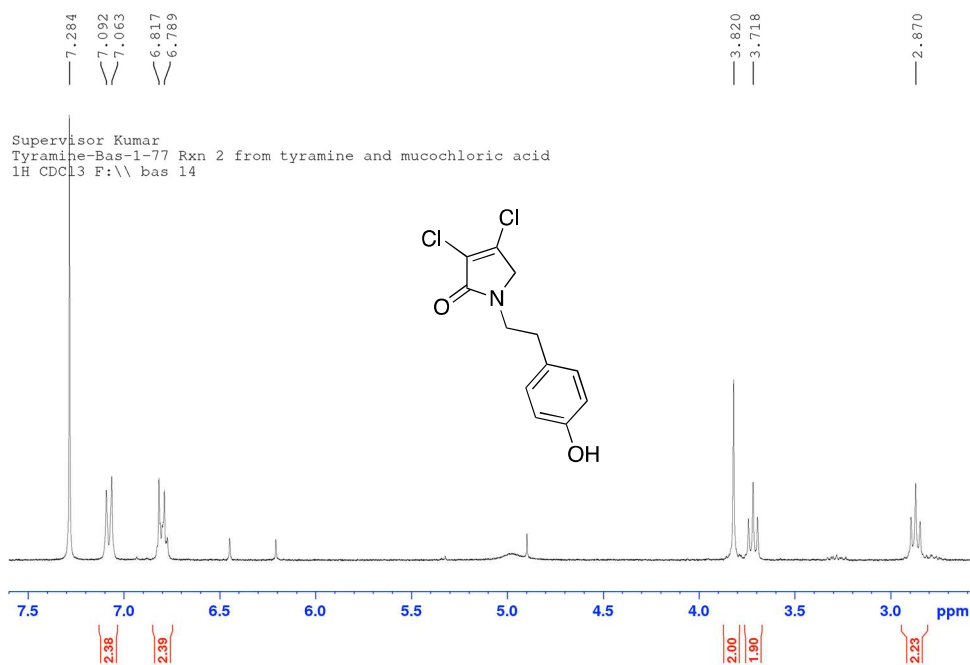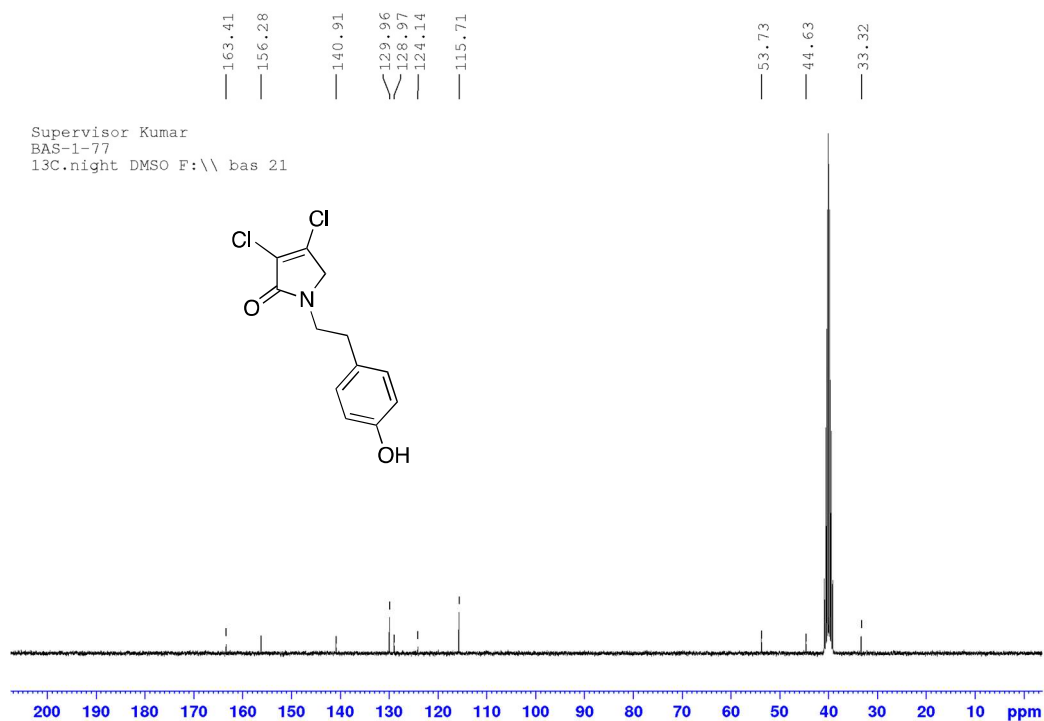

23) *N*-butyl-4-(3,4-dichloro-2-oxo-2,5-dihydro-1*H*-pyrrol-1-yl)benzamide  
(Compound 32)

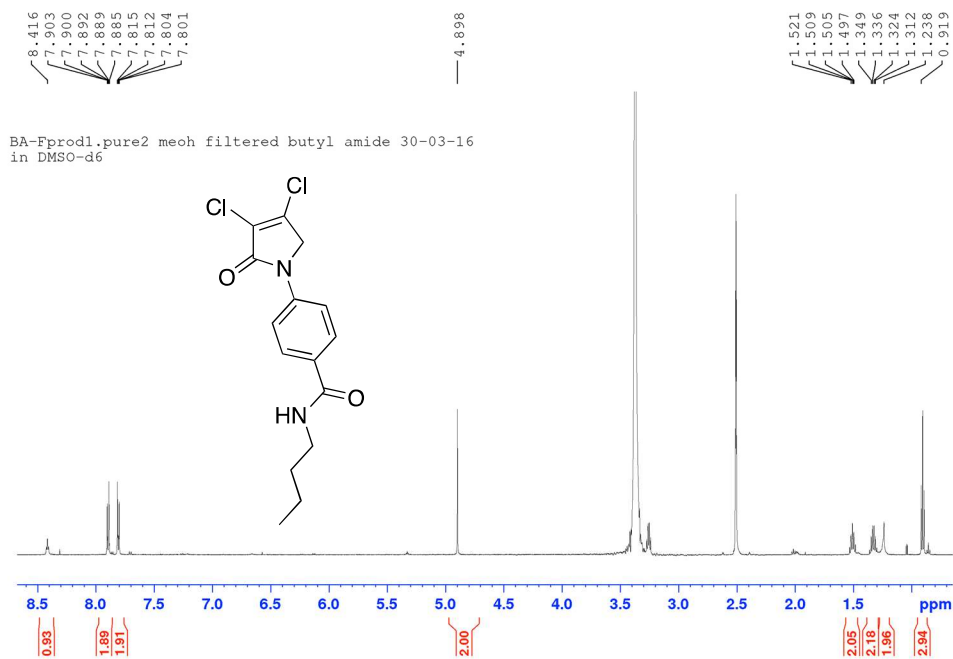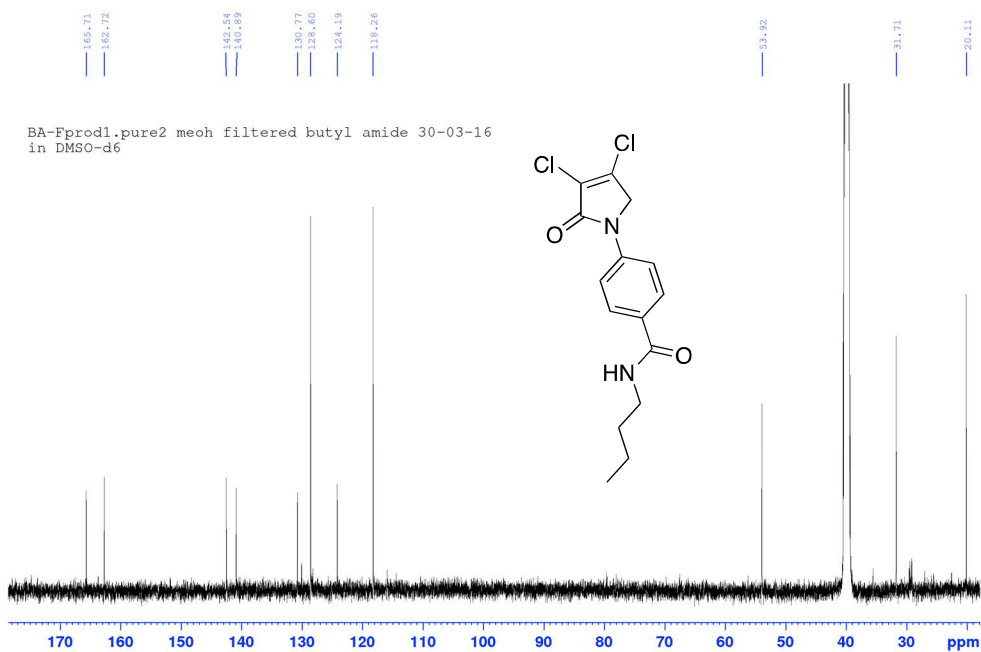

24) *N*-hexyl-4-(3,4-dichloro-2-oxo-2,5-dihydro-1*H*-pyrrol-1-yl)benzamide  
(Compound 33)

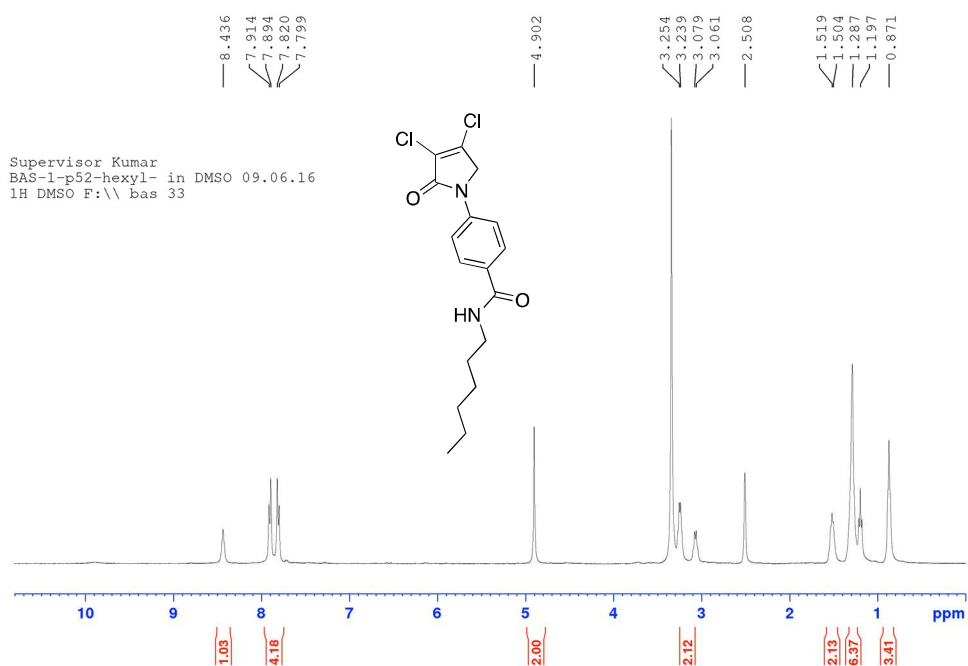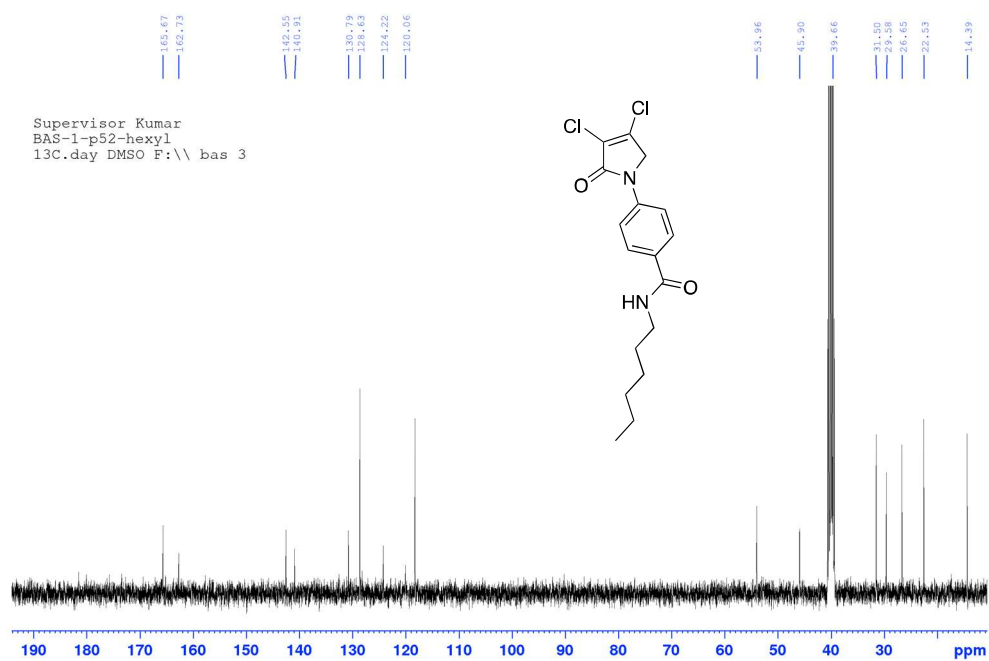

## 25) N-benzyl-4-(3,4-dichloro-2-oxo-2,5-dihydro-1H-pyrrol-1-yl)benzamide (Compound 34)

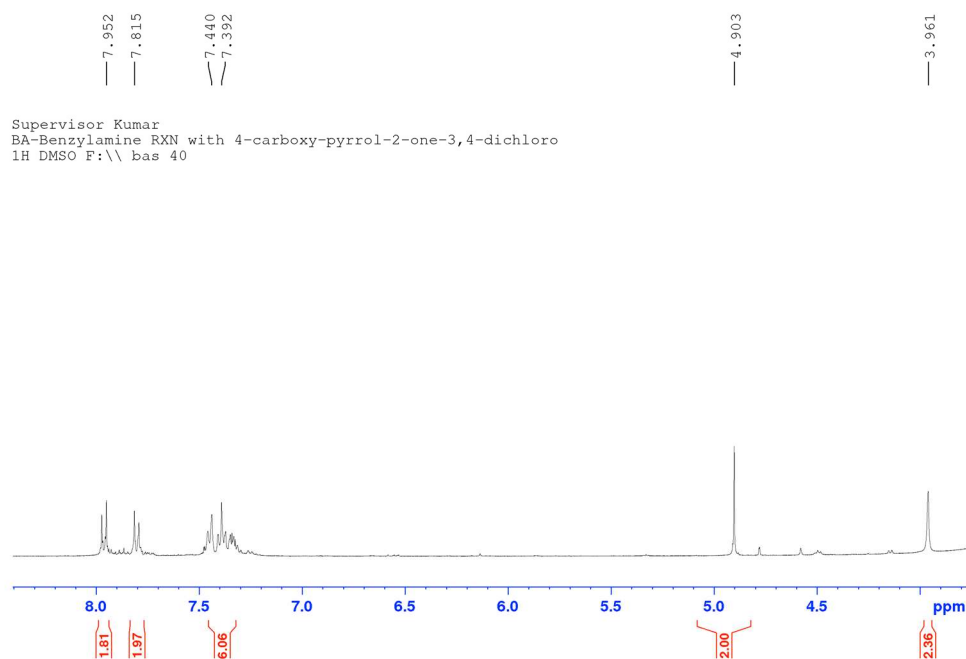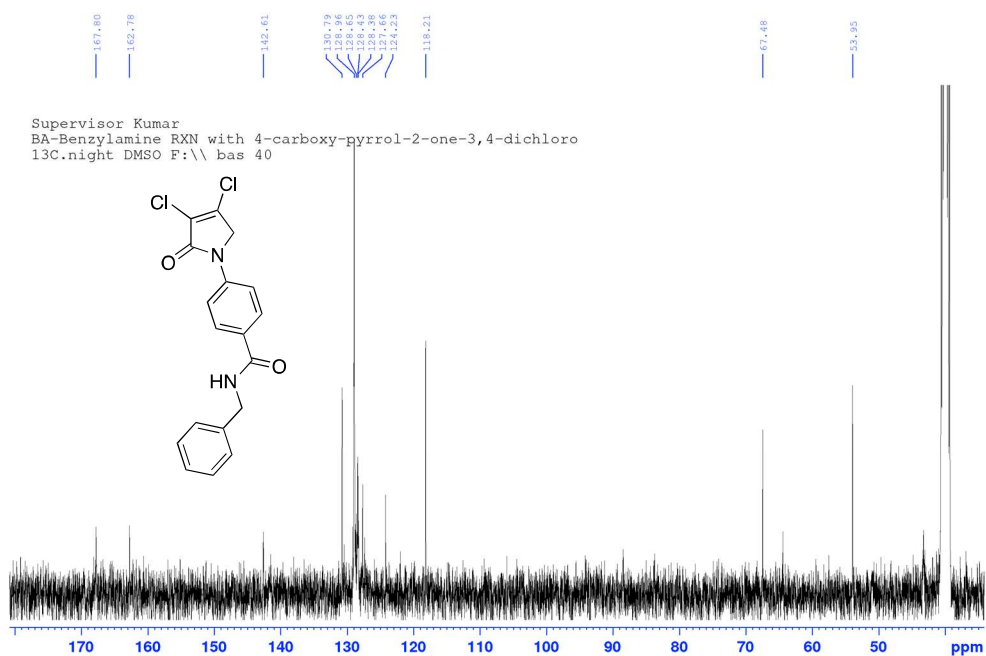

26) *N*-(2-(1*H*-indol-3-yl)ethyl)-4-(3,4-dichloro-2-oxo-2,5-dihydro-1*H*-pyrrol-1-yl)benzamide (Compound 35)

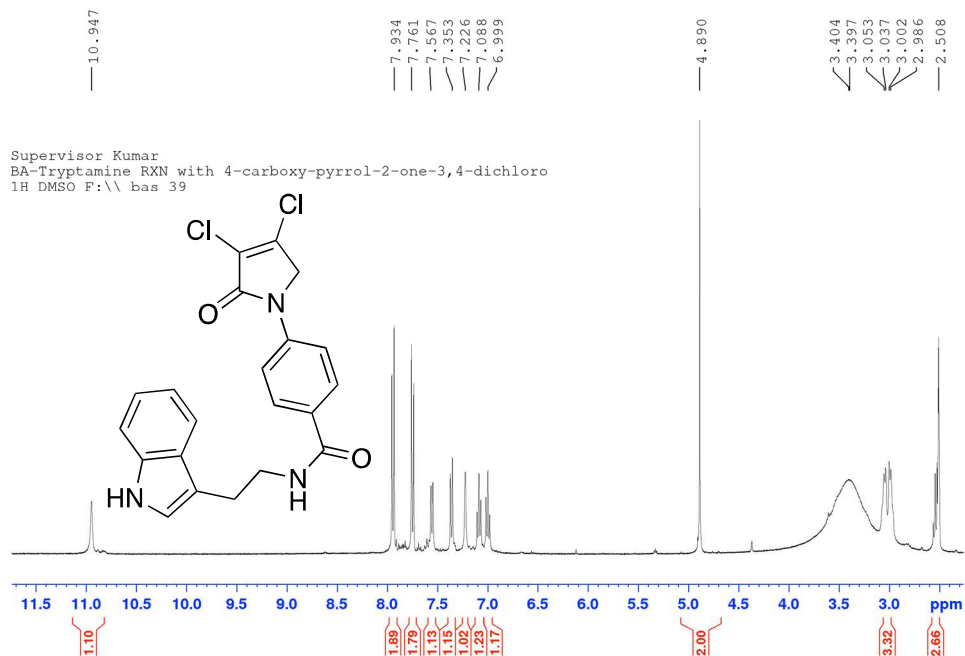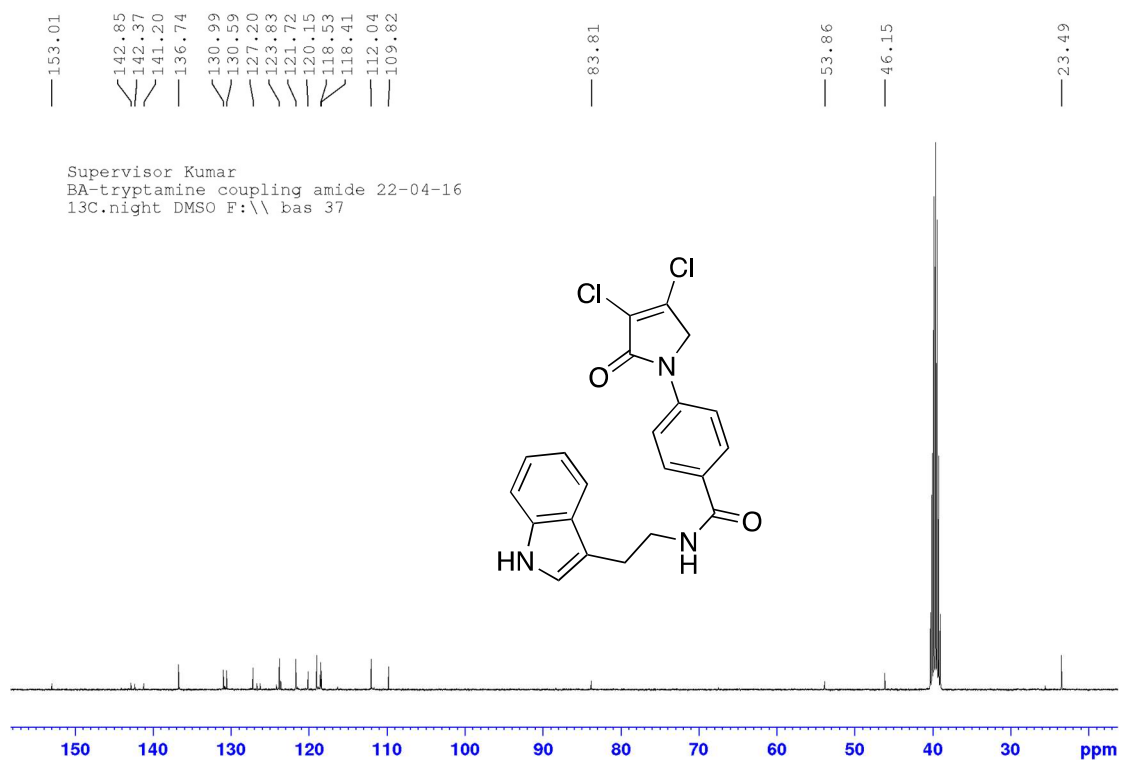

27) 4-(3,4-dichloro-2-oxo-2,5-dihydro-1H-pyrrol-1-yl)-N-(2-morpholinoethyl)benzamide (Compound 36)

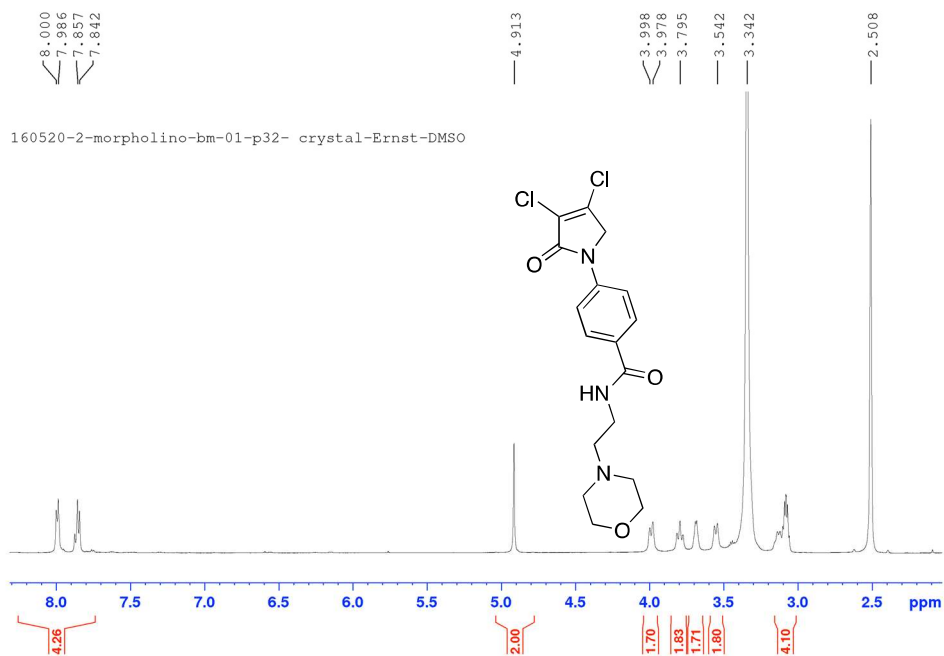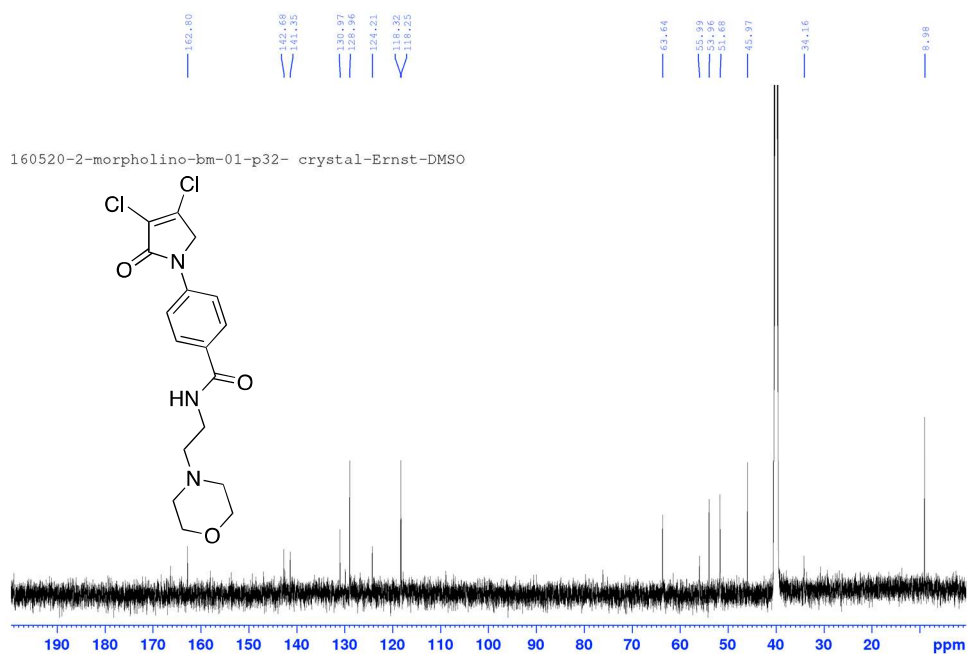



28) 4-(3,4-dichloro-2-oxo-2,5-dihydro-1H-pyrrol-1-yl)-N-(3-morpholinopropyl)benzamide (Compound 37)

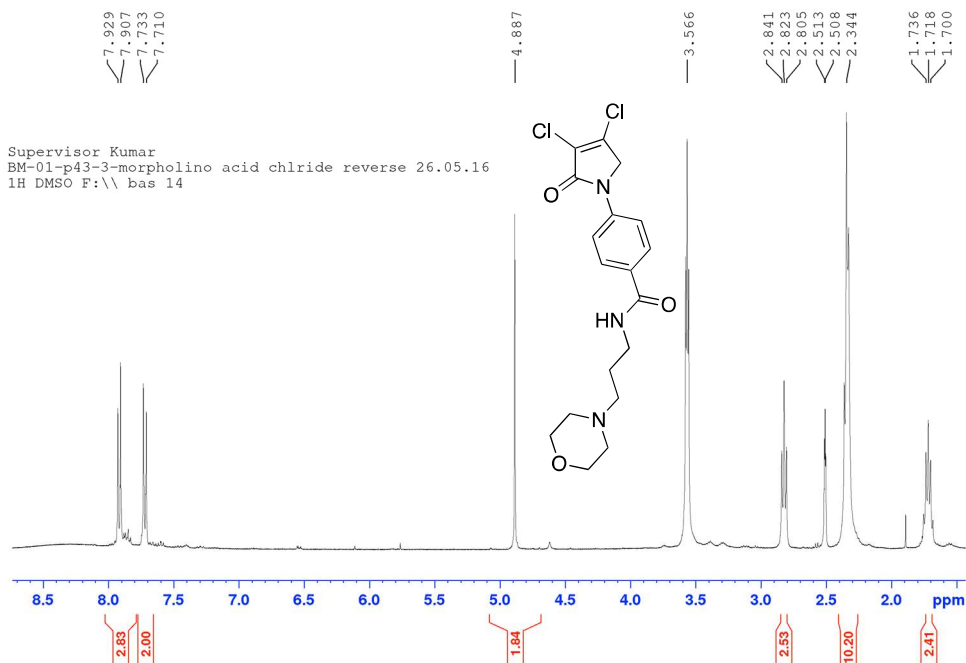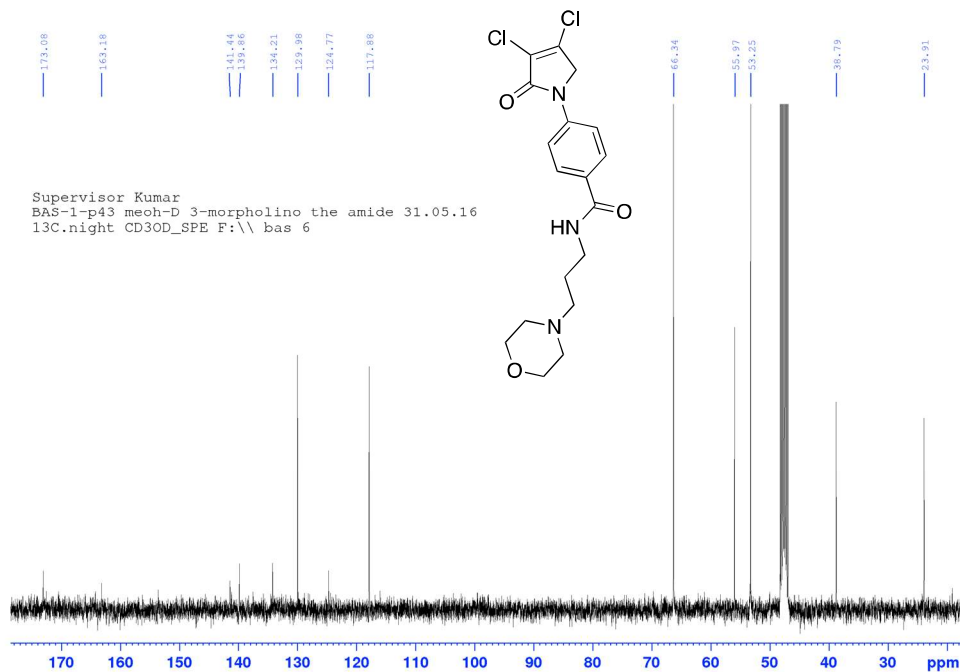

29) 4-(3,4-dichloro-2-oxo-2,5-dihydro-1H-pyrrol-1-yl)-N-(3-(piperidin-1-yl)propyl)benzamide (Compound 38)

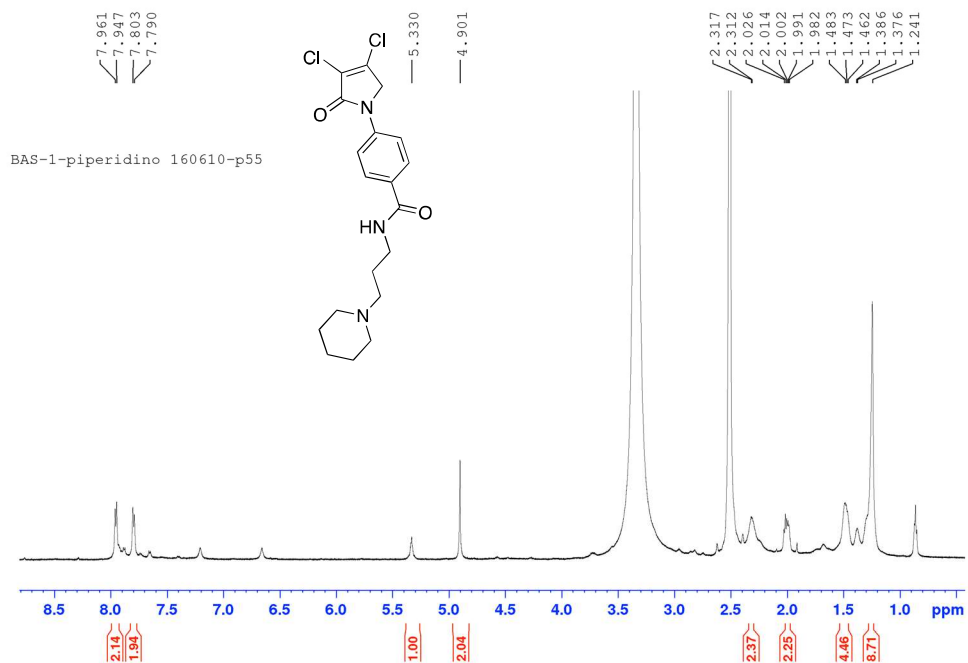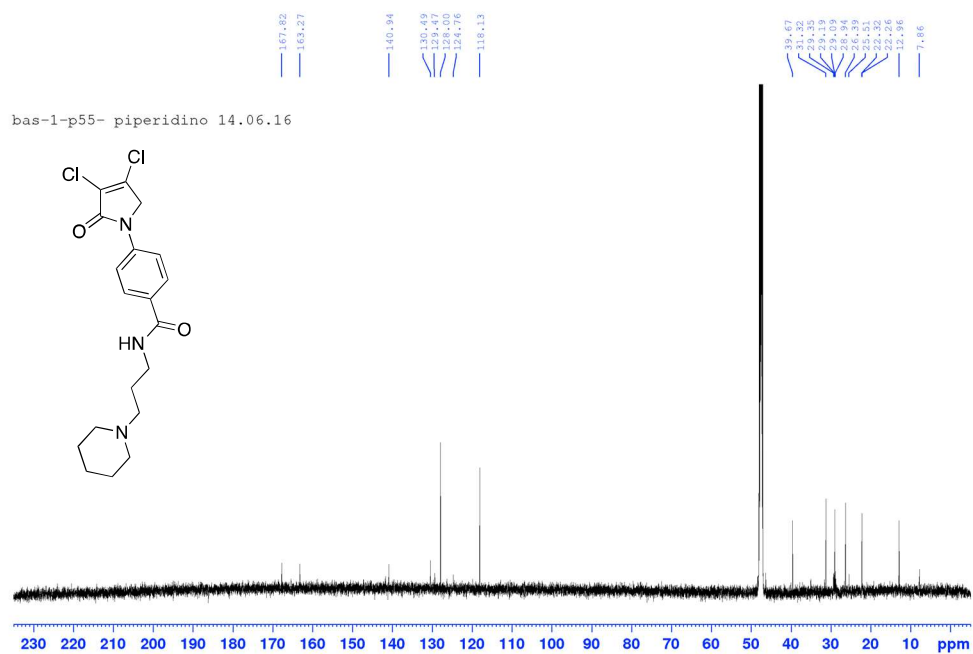

30) *N*-(4-(3,4-dichloro-2-oxo-2,5-dihydro-1*H*-pyrrol-1-yl)phenyl)butyramide  
(Compound 39)

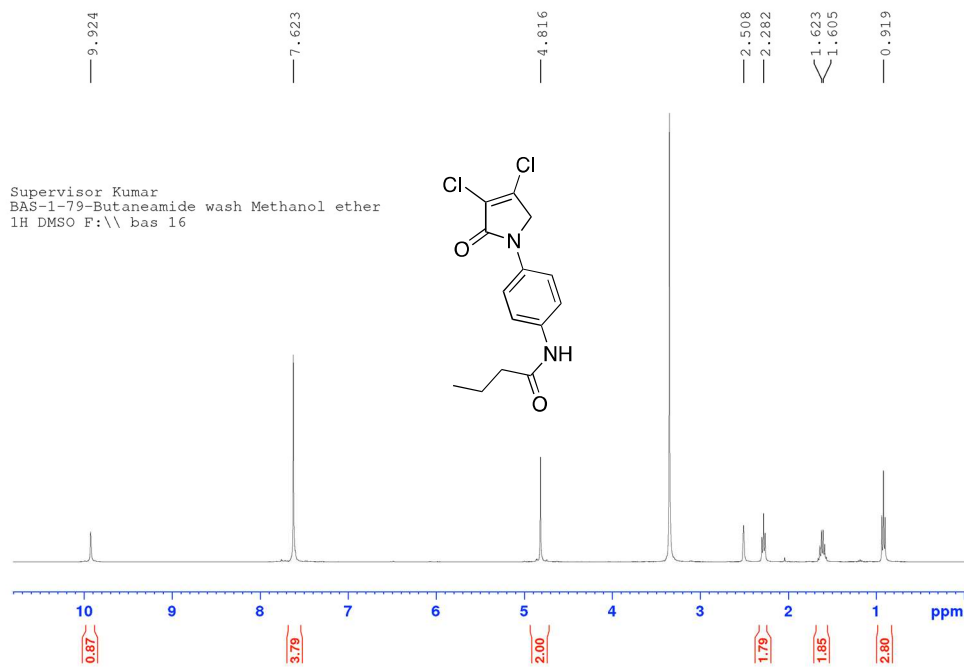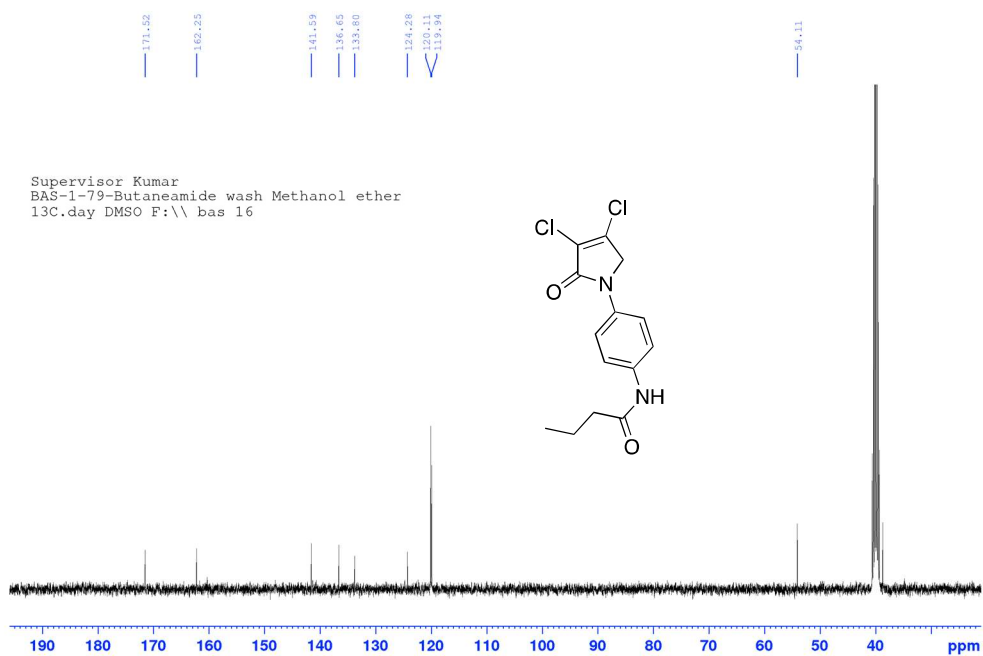

31) *N*-(4-(3,4-dichloro-2-oxo-2,5-dihydro-1*H*-pyrrol-1-yl)phenyl)hexanamide  
(Compound 40)

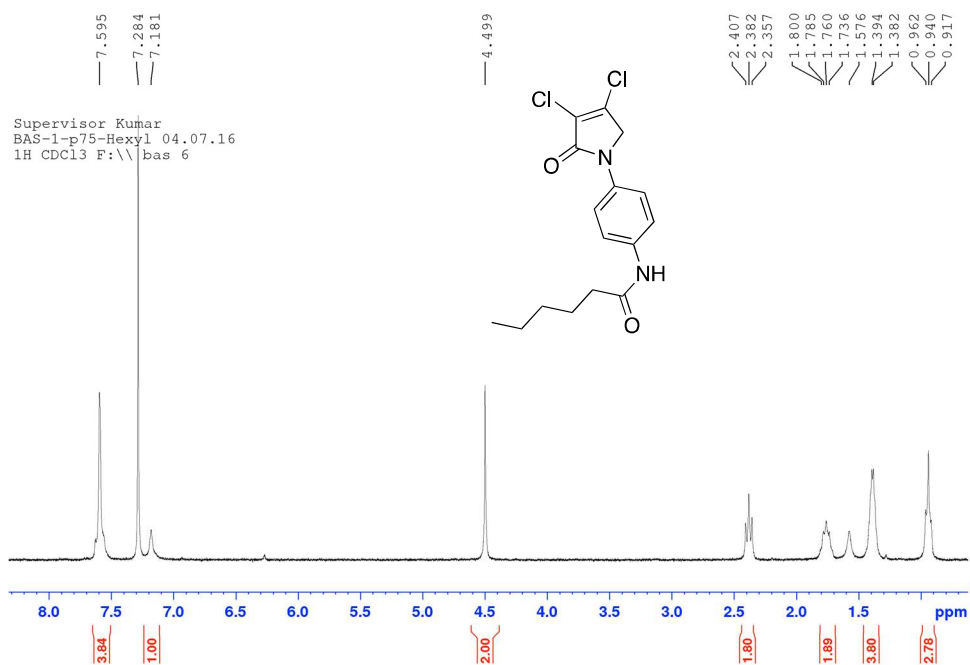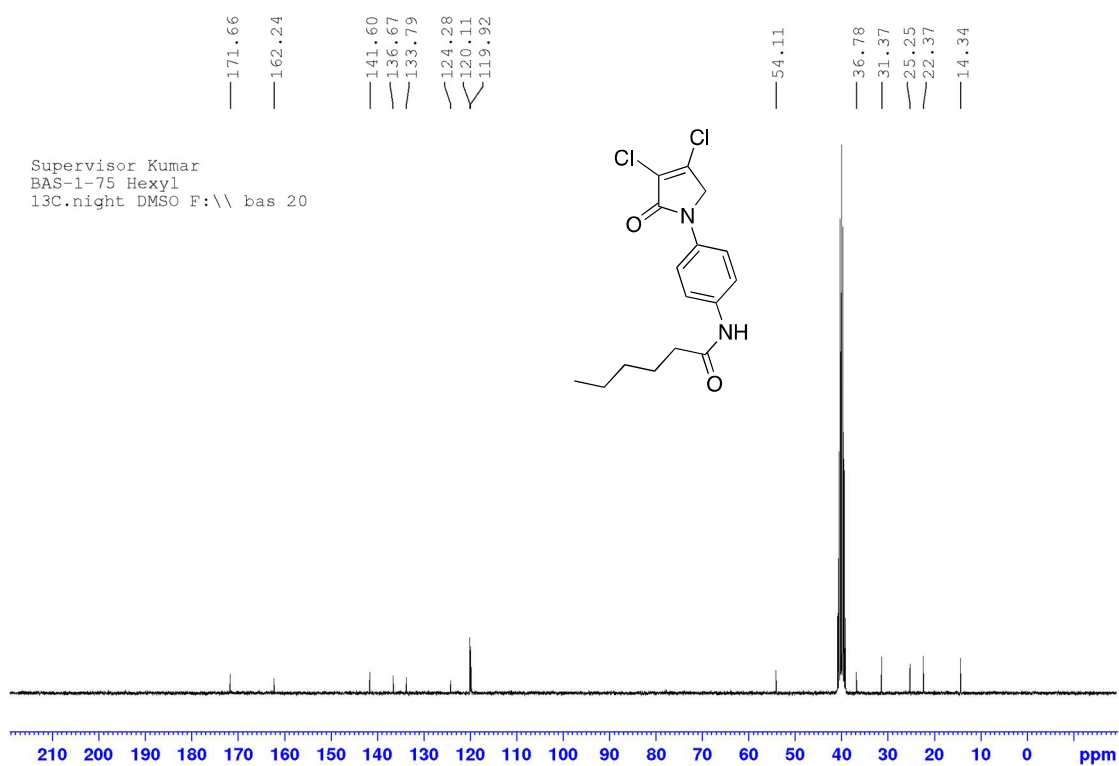

32) N-(4-(3,4-dichloro-2-oxo-2,5-dihydro-1H-pyrrol-1-yl)phenyl)octanamide  
(Compound 41)

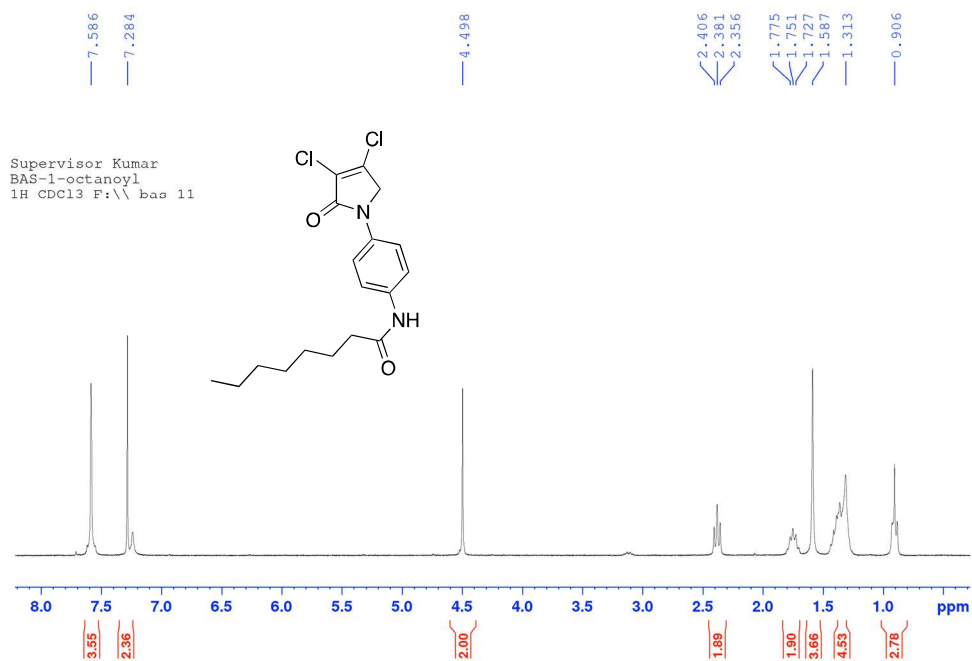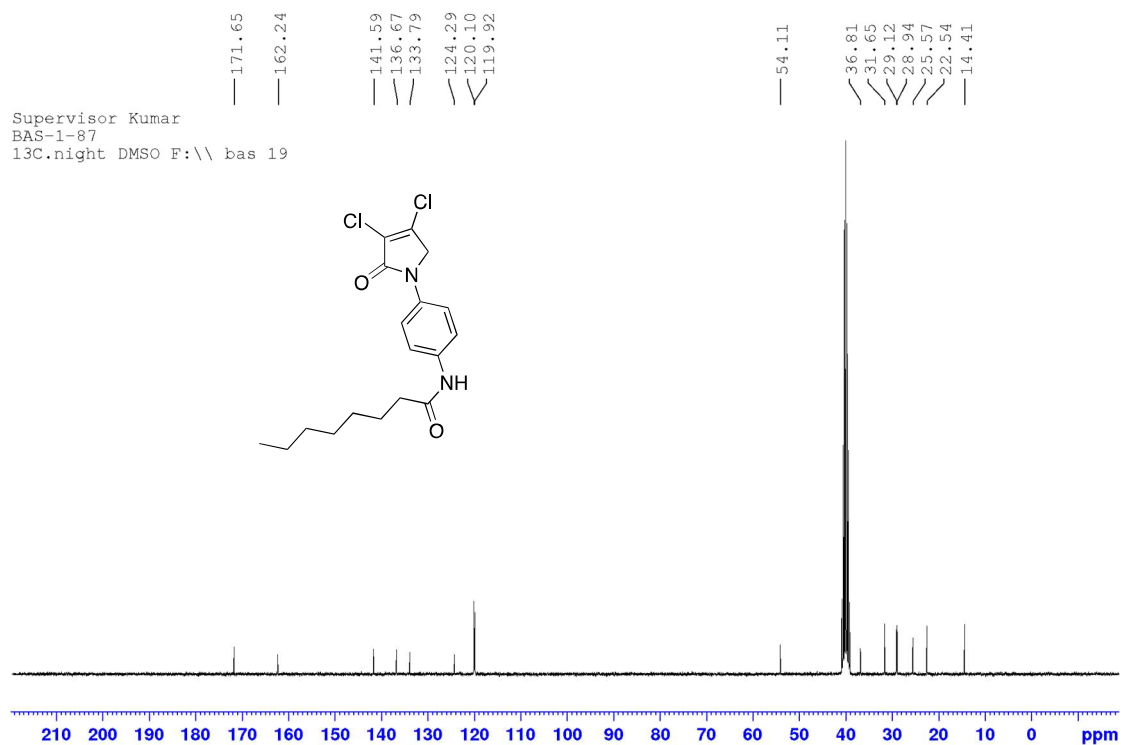

### 33) 2-(4-bromophenyl)-N-(4-(3,4-dichloro-2-oxo-2,5-dihydro-1H-pyrrol-1-yl)phenyl)acetamide (Compound 42)

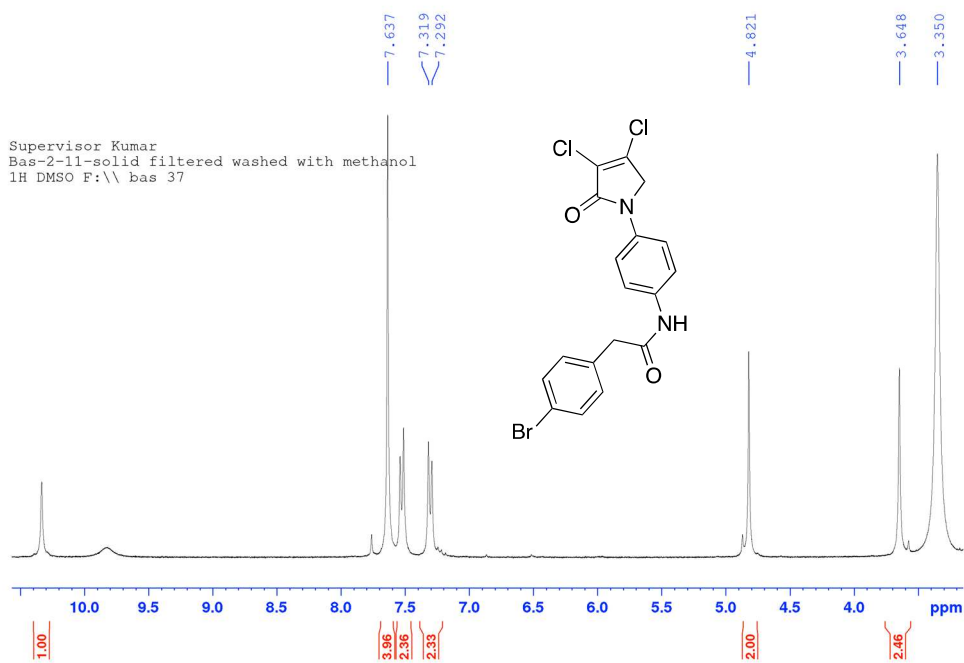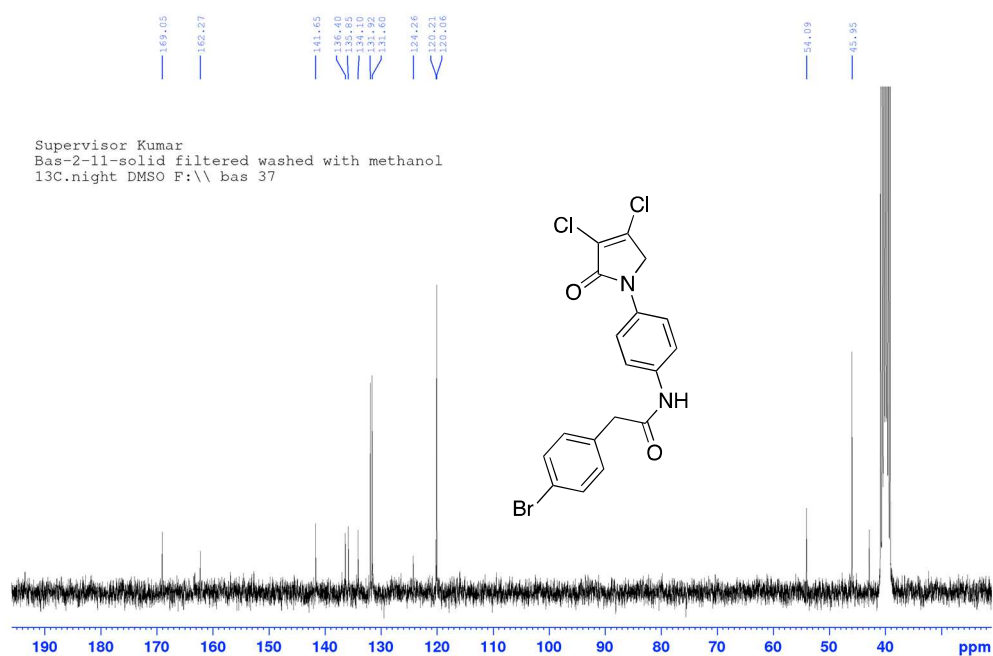

Supplement: molecules-23-01106-s001.pdf [file molecules-23-01106-s001.pdf]
